# Supplementary material for: The syntheses, structures and spectroelectrochemical properties of 6-oxo-verdazyl derivatives bearing surface anchoring groups
Source: Royal Society of Chemistry journal article supplement (doi:10.1039/d1tc05495c), 2021-12-21
Supplement: d1tc05495c1.pdf [file d1tc05495c1.pdf]

## The syntheses, structures and spectroelectrochemical properties of 6-oxo-verdazyl derivatives bearing surface anchoring groups

Varshini J. Kumar,<sup>a,†</sup> Jian-Zhong Wu,<sup>b,\*†</sup> Martyna Judd,<sup>c</sup> Elodie Rousset,<sup>a</sup> Marcus Korb,<sup>a</sup>  
Stephen A. Moggach,<sup>a</sup> Nicholas Cox,<sup>c</sup> Paul J. Low<sup>a,\*</sup>

<sup>a</sup> School of Molecular Sciences, University of Western Australia, 35 Stirling Highway, Crawley, Western Australia, 6009, Australia, [paul.low@uwa.edu.au](mailto:paul.low@uwa.edu.au)

<sup>b</sup> School of Chemistry, South China Normal University, Guangzhou 510006, China, [wujzh@scnu.edu.cn](mailto:wujzh@scnu.edu.cn)

<sup>c</sup> Research School of Chemistry, Australian National University, Canberra, ACT, 2601, Australia

† These authors contributed equally

### CONTENTS

|                                                                                                                                                                                                                                                                                                                                                                                                                                                                                       |           |
|---------------------------------------------------------------------------------------------------------------------------------------------------------------------------------------------------------------------------------------------------------------------------------------------------------------------------------------------------------------------------------------------------------------------------------------------------------------------------------------|-----------|
| <b>Figure S1.</b> A plot of the crystallographically determined molecular structure of <b>2a</b> with thermal ellipsoids drawn at 50% probability. Hydrogen atoms omitted for clarity. Selected bond lengths (Å) and angles (°): C1-Cl1, 1.777(2); C1-O1, 1.197(2); C1-N1, 1.356(2); N1-C9, 1.449(2); N1-N2, 1.390(2); N2-C2, 1.276(2); C2-C3, 1.470(2); Cl1-C1-O1, 120.0(2); O1-C1-N1, 126.1(2); C1-N1-C9, 118.8(2); C1-N1-N2, 118.8(2); N1-N2-C2, 118.8(2); N2-C2-C3, 118.6(1)..... | <b>4</b>  |
| <b>Figure S2.</b> A plot of the crystallographically determined molecular structure of <b>3a</b> with thermal ellipsoids drawn at 50% probability. Selected hydrogen atoms omitted for clarity.                                                                                                                                                                                                                                                                                       | <b>4</b>  |
| <b>Figure S3.</b> a) Plots of the crystallographically determined molecular structure of <b>3c</b> with thermal ellipsoids at 20%, for molecule 1 (top) and molecule 2 (bottom) of the asymmetric unit. b) Spatial arrangement of the two molecules in the asymmetric unit, forming an angle of 70(1)° between the two mean plane containing the four nitrogen atoms. Selected hydrogen atoms omitted for clarity.....                                                                | <b>5</b>  |
| <b>Figure S4.</b> A plot of the crystallographically determined molecular structure of <b>4a</b> with thermal ellipsoids drawn at 50% probability. Hydrogen atoms omitted for clarity.....                                                                                                                                                                                                                                                                                            | <b>6</b>  |
| <b>Figure S5.</b> A plot of the crystallographically determined molecular structure of <b>4c</b> with thermal ellipsoids drawn at 50% probability. Hydrogen atoms omitted for clarity.....                                                                                                                                                                                                                                                                                            | <b>6</b>  |
| <b>Table S1.</b> Crystal structure and refinement details.....                                                                                                                                                                                                                                                                                                                                                                                                                        | <b>7</b>  |
| <b>Table S2.</b> Summary of TD-DFT results from the model compound 2,4,6-triphenyl-1,2,4,5-tetrazinan-3-one ( <b>A</b> ) (B3LYP / 6-31G*(df,p) / COSMO(CPCM) (CH <sub>2</sub> Cl <sub>2</sub> )). .....                                                                                                                                                                                                                                                                               | <b>8</b>  |
| <b>Table S3.</b> Summary of TD-DFT results from the model compound 1,3,5-triphenyl-6-oxo-verdazyl ( <b>B</b> ) (B3LYP / 6-31G*(df,p) / COSMO(CPCM) (CH <sub>2</sub> Cl <sub>2</sub> )).....                                                                                                                                                                                                                                                                                           | <b>9</b>  |
| <b>Table S4.</b> Summary of TD-DFT results from the model compound 1,5-bis(phenylethynyl)-3-phenyl-6-oxo-verdazyl ( <b>C</b> ) (B3LYP / 6-31G*(df,p) / COSMO(CPCM) (CH <sub>2</sub> Cl <sub>2</sub> )). .....                                                                                                                                                                                                                                                                         | <b>11</b> |
| <b>Figure S6.</b> The UV-vis spectra ( $\tilde{\nu}_{max}$ / cm <sup>-1</sup> ( $\epsilon$ / M <sup>-1</sup> cm <sup>-1</sup> )) of tetrazines <b>3a - c</b> , <b>5</b> , <b>6</b> and <b>7</b> ..                                                                                                                                                                                                                                                                                    | <b>13</b> |

|                                                                                                                                                                                                                                                                                                                                                                                       |           |
|---------------------------------------------------------------------------------------------------------------------------------------------------------------------------------------------------------------------------------------------------------------------------------------------------------------------------------------------------------------------------------------|-----------|
| <b>Figure S7.</b> The UV-vis spectra ( $\tilde{\nu}_{max} / \text{cm}^{-1}$ ( $\epsilon / \text{M}^{-1}\text{cm}^{-1}$ ) of verdazyls <b>4a – c</b> , <b>8</b> , <b>9</b> and <b>10</b> ..                                                                                                                                                                                            | <b>14</b> |
| <b>Figure S8.</b> Plots of the spin density from the model verdazyl radical (a) [ <b>B</b> ] (b) [ <b>C</b> ] .....                                                                                                                                                                                                                                                                   | <b>15</b> |
| <b>Figure S9.</b> Cyclic Voltammograms of compounds <b>4a – c</b> and <b>8 – 10</b> in 0.1 M NBu <sub>4</sub> PF <sub>6</sub> / CH <sub>2</sub> Cl <sub>2</sub> solution. Voltammograms are plotted vs ferrocene/ferrocenium ( $E_{1/2} = 0$ V) from data collected against a decamethylferrocene / decamethylferrocenium internal reference couple ( $E_{1/2} = -0.55$ V).....       | <b>16</b> |
| <b>Figure S10.</b> Square Wave Voltammograms of compounds <b>4a – c</b> and <b>8 – 10</b> in 0.1 M NBu <sub>4</sub> PF <sub>6</sub> / CH <sub>2</sub> Cl <sub>2</sub> solution. Voltammograms are plotted vs ferrocene/ferrocenium ( $E_{1/2} = 0$ V) from data collected against a decamethylferrocene / decamethylferrocenium internal reference couple ( $E_{1/2} = -0.55$ V)..... | <b>17</b> |
| <b>Table S5.</b> Summary of UV-vis-NIR spectroelectrochemical data for compounds <b>4a-c</b> , <b>9</b> and <b>10</b> .....                                                                                                                                                                                                                                                           | <b>18</b> |
| <b>Figure S11.</b> Plots of spectroelectrochemical data of <b>4b</b> in the UV-vis-NIR region. ....                                                                                                                                                                                                                                                                                   | <b>19</b> |
| <b>Figure S12.</b> Plots of spectroelectrochemical data of <b>4c</b> in the UV-vis-NIR region.....                                                                                                                                                                                                                                                                                    | <b>19</b> |
| <b>Figure S13.</b> The spectroelectrochemically generated spectra of [ <b>10</b> ] <sup>-</sup> .....                                                                                                                                                                                                                                                                                 | <b>19</b> |
| <b>Figure S14.</b> The <sup>1</sup> H NMR spectrum of <b>3a</b> .....                                                                                                                                                                                                                                                                                                                 | <b>20</b> |
| <b>Figure S15.</b> The <sup>13</sup> C{ <sup>1</sup> H} NMR spectrum of <b>3a</b> .....                                                                                                                                                                                                                                                                                               | <b>21</b> |
| <b>Figure S16.</b> The mass spectrum of <b>3a</b> .....                                                                                                                                                                                                                                                                                                                               | <b>22</b> |
| <b>Figure S17.</b> The mass spectrum of <b>4a</b> .....                                                                                                                                                                                                                                                                                                                               | <b>23</b> |
| <b>Figure S18.</b> The <sup>1</sup> H NMR spectrum of <b>3b</b> . The inset shows an expansion of the aromatic region for clarity. ....                                                                                                                                                                                                                                               | <b>24</b> |
| <b>Figure S19.</b> The <sup>13</sup> C{ <sup>1</sup> H} NMR spectrum of <b>3b</b> . ....                                                                                                                                                                                                                                                                                              | <b>25</b> |
| <b>Figure S20.</b> The mass spectrum of <b>3b</b> .....                                                                                                                                                                                                                                                                                                                               | <b>26</b> |
| <b>Figure S21.</b> The mass spectrum of <b>4b</b> .....                                                                                                                                                                                                                                                                                                                               | <b>27</b> |
| <b>Figure S22.</b> The <sup>1</sup> H NMR spectrum of <b>3c</b> . The inset shows an expansion of the aromatic region for clarity. ....                                                                                                                                                                                                                                               | <b>28</b> |
| <b>Figure S23.</b> The <sup>13</sup> C{ <sup>1</sup> H} NMR spectrum of <b>3c</b> .....                                                                                                                                                                                                                                                                                               | <b>29</b> |
| <b>Figure S24.</b> The mass spectrum of <b>3c</b> . ....                                                                                                                                                                                                                                                                                                                              | <b>30</b> |
| <b>Figure S25.</b> The mass spectrum of <b>4c</b> . ....                                                                                                                                                                                                                                                                                                                              | <b>31</b> |
| <b>Figure S26.</b> The <sup>1</sup> H NMR spectrum of <b>5</b> . The inset shows an expansion of the aromatic region for clarity. ....                                                                                                                                                                                                                                                | <b>32</b> |
| <b>Figure S27.</b> The <sup>13</sup> C{ <sup>1</sup> H} NMR spectrum of <b>5</b> . ....                                                                                                                                                                                                                                                                                               | <b>33</b> |
| <b>Figure S28.</b> The mass spectrum of <b>5</b> . ....                                                                                                                                                                                                                                                                                                                               | <b>34</b> |
| <b>Figure S29.</b> The <sup>1</sup> H NMR spectrum of <b>6</b> . The inset shows an expansion of the aromatic region for clarity. ....                                                                                                                                                                                                                                                | <b>35</b> |
| <b>Figure S30.</b> The <sup>13</sup> C{ <sup>1</sup> H} NMR spectrum of <b>6</b> . ....                                                                                                                                                                                                                                                                                               | <b>36</b> |
| <b>Figure S31.</b> The mass spectrum of <b>6</b> . ....                                                                                                                                                                                                                                                                                                                               | <b>37</b> |
| <b>Figure S32.</b> The <sup>1</sup> H NMR spectrum of <b>7</b> . The inset shows an expansion of the aromatic region for clarity. ....                                                                                                                                                                                                                                                | <b>38</b> |

|                                                                                     |           |
|-------------------------------------------------------------------------------------|-----------|
| <b>Figure S33.</b> The $^{13}\text{C}\{^1\text{H}\}$ NMR spectrum of <b>7</b> ..... | <b>39</b> |
| <b>Figure S34.</b> The mass spectrum of <b>7</b> .....                              | <b>40</b> |
| <b>Figure S35.</b> The mass spectrum of <b>8</b> .....                              | <b>41</b> |
| <b>Figure S36.</b> The mass spectrum of <b>9</b> .....                              | <b>42</b> |
| <b>Figure S37.</b> The mass spectrum of <b>10</b> .....                             | <b>43</b> |
| Additional EPR materials and Methods .....                                          | <b>44</b> |

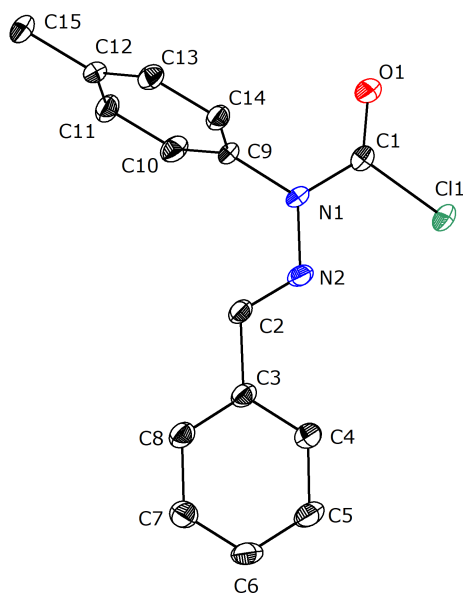

**Figure S1.** A plot of the crystallographically determined molecular structure of **2a** with thermal ellipsoids drawn at 50% probability. Hydrogen atoms omitted for clarity. Selected bond lengths (Å) and angles (°): C1-Cl1, 1.777(2); C1-O1, 1.197(2); C1-N1, 1.356(2); N1-C9, 1.449(2); N1-N2, 1.390(2); N2-C2, 1.276(2); C2-C3, 1.470(2); Cl1-C1-O1, 120.0(2); O1-C1-N1, 126.1(2); C1-N1-C9, 118.8(2); C1-N1-N2, 118.8(2); N1-N2-C2, 118.8(2); N2-C2-C3, 118.6(1).

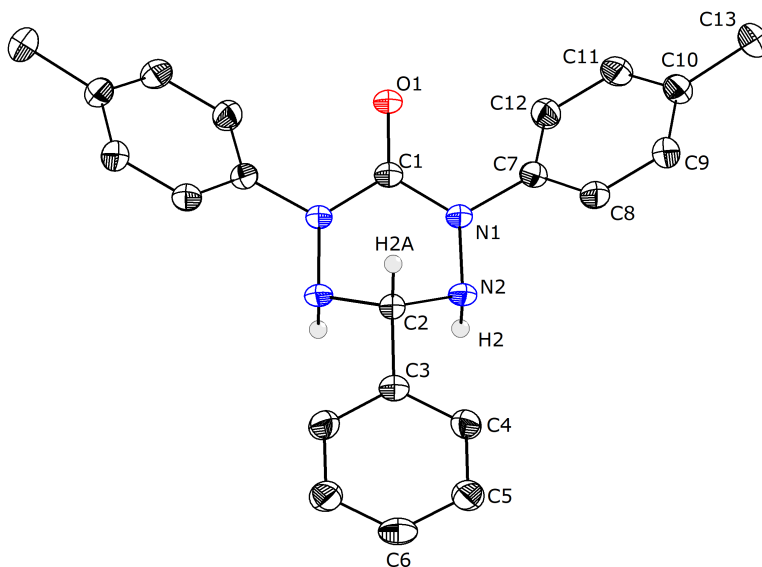

**Figure S2.** A plot of the crystallographically determined molecular structure of **3a** with thermal ellipsoids drawn at 50% probability. Selected hydrogen atoms omitted for clarity.

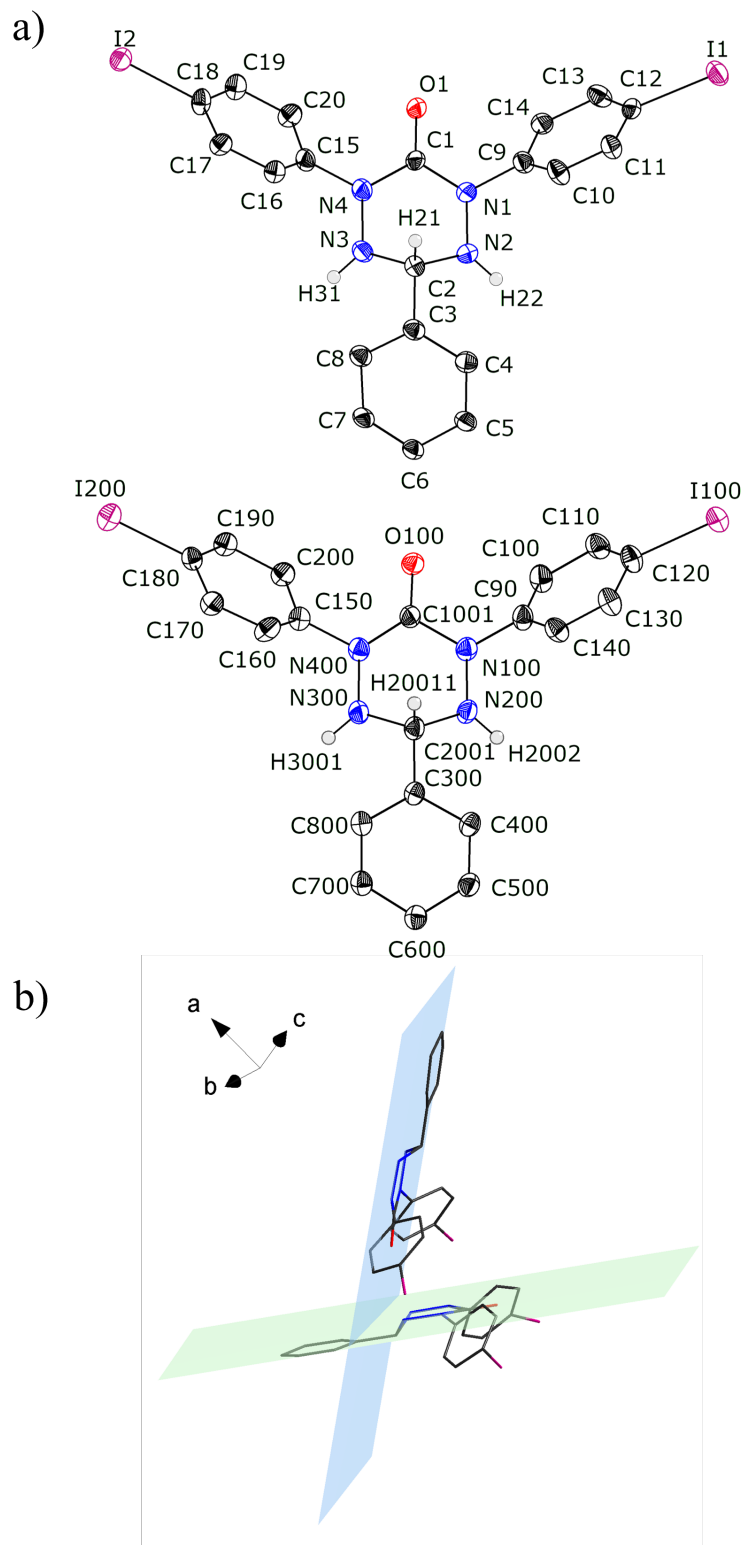

**Figure S3.** a) Plots of the crystallographically determined molecular structure of **3c** with thermal ellipsoids at 20%, for molecule 1 (top) and molecule 2 (bottom) of the asymmetric unit. b) Spatial arrangement of the two molecules in the asymmetric unit, forming an angle of  $70(1)^\circ$  between the two mean plane containing the four nitrogen atoms. Selected hydrogen atoms omitted for clarity.

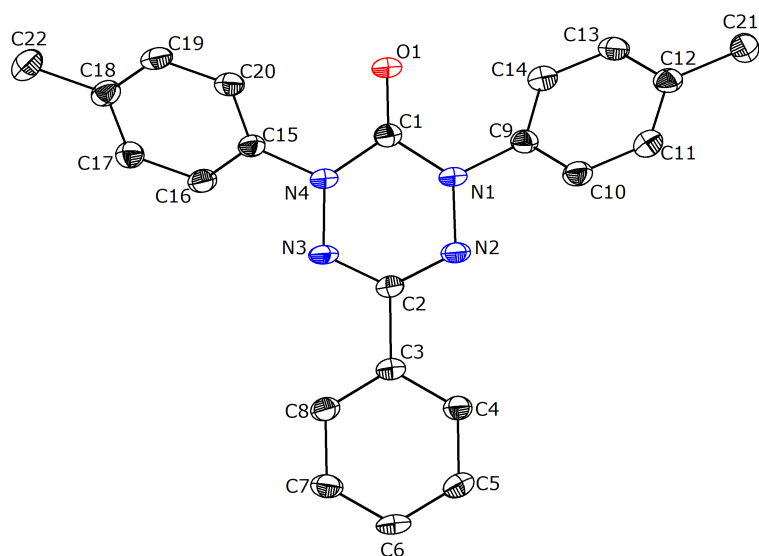

**Figure S4.** A plot of the crystallographically determined molecular structure of **4a** with thermal ellipsoids drawn at 50% probability. Hydrogen atoms omitted for clarity.

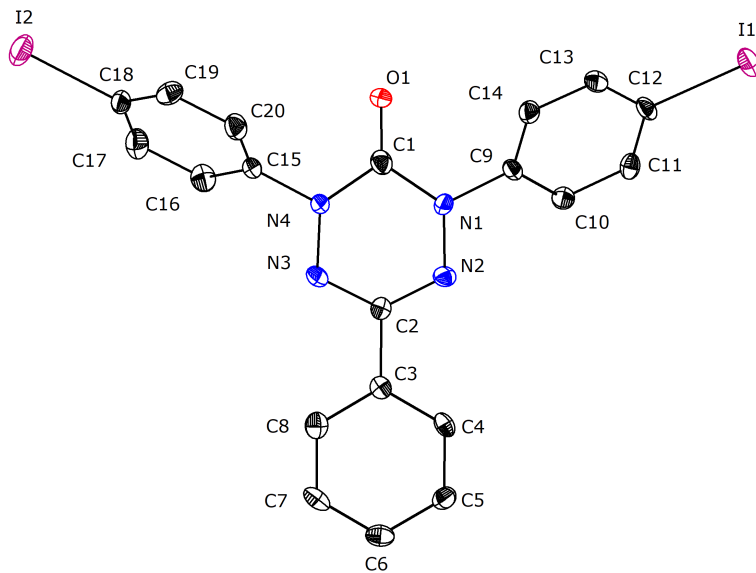

**Figure S5.** A plot of the crystallographically determined molecular structure of **4c** with thermal ellipsoids drawn at 50% probability. Hydrogen atoms omitted for clarity.

**Table S1.** Crystal structure and refinement details

|                                                      | <b>2a</b>                                                                      | <b>3a</b>                                                                      | <b>3b</b>                                                                      | <b>3c</b>                                                                        | <b>4a</b>                                                                      | <b>4b</b>                                                                      | <b>4c</b>                                                                      |
|------------------------------------------------------|--------------------------------------------------------------------------------|--------------------------------------------------------------------------------|--------------------------------------------------------------------------------|----------------------------------------------------------------------------------|--------------------------------------------------------------------------------|--------------------------------------------------------------------------------|--------------------------------------------------------------------------------|
| CCDC Number                                          | <b>2109616</b>                                                                 | <b>2109617</b>                                                                 | <b>2109618</b>                                                                 | <b>2109619</b>                                                                   | <b>2109620</b>                                                                 | <b>2109621</b>                                                                 | <b>2109622</b>                                                                 |
| Empirical formula                                    | C <sub>15</sub> H <sub>13</sub> ClN <sub>2</sub> O                             | C <sub>22</sub> H <sub>22</sub> N <sub>4</sub> O                               | C <sub>24</sub> H <sub>24</sub> Cl <sub>6</sub> N <sub>4</sub> OS <sub>2</sub> | C <sub>20</sub> H <sub>16</sub> I <sub>2</sub> N <sub>4</sub> O                  | C <sub>22</sub> H <sub>19</sub> N <sub>4</sub> O                               | C <sub>22</sub> H <sub>19</sub> N <sub>4</sub> OS <sub>2</sub>                 | C <sub>20</sub> H <sub>13</sub> I <sub>2</sub> N <sub>4</sub> O                |
| Formula weight                                       | 272.72                                                                         | 358.43                                                                         | 661.29                                                                         | 582.18                                                                           | 355.41                                                                         | 419.53                                                                         | 579.14                                                                         |
| Temperature/K                                        | 99.8(7)                                                                        | 99.8(6)                                                                        | 99.9(6)                                                                        | 100                                                                              | 99.8(6)                                                                        | 99.9(4)                                                                        | 99.95(10)                                                                      |
| Crystal system                                       | <i>monoclinic</i>                                                              | <i>monoclinic</i>                                                              | <i>monoclinic</i>                                                              | <i>triclinic</i>                                                                 | <i>monoclinic</i>                                                              | <i>monoclinic</i>                                                              | <i>triclinic</i>                                                               |
| Space group                                          | <i>P2<sub>1</sub>/c</i>                                                        | <i>P2<sub>1</sub>/m</i>                                                        | <i>I2/a</i>                                                                    | <i>P-1</i>                                                                       | <i>P2<sub>1</sub>/n</i>                                                        | <i>P2<sub>1</sub>/c</i>                                                        | <i>P-1</i>                                                                     |
| <i>a</i> /Å                                          | 8.9460(2)                                                                      | 5.1113(2)                                                                      | 24.2469(4)                                                                     | 8.6930(5)                                                                        | 7.1902(2)                                                                      | 7.2557(2)                                                                      | 4.0177(2)                                                                      |
| <i>b</i> /Å                                          | 11.1772(3)                                                                     | 22.2891(9)                                                                     | 5.37710(10)                                                                    | 12.8412(7)                                                                       | 11.2885(3)                                                                     | 24.1715(7)                                                                     | 10.1392(5)                                                                     |
| <i>c</i> /Å                                          | 13.8578(3)                                                                     | 8.3663(4)                                                                      | 44.3688(11)                                                                    | 18.8190(8)                                                                       | 21.8846(7)                                                                     | 11.2028(3)                                                                     | 23.1774(9)                                                                     |
| <i>α</i> /°                                          | 90                                                                             | 90                                                                             | 90                                                                             | 74.349(4)                                                                        | 90                                                                             | 90                                                                             | 87.900(4)                                                                      |
| <i>β</i> /°                                          | 100.517(2)                                                                     | 105.156(5)                                                                     | 95.275(2)                                                                      | 82.296(4)                                                                        | 90.343(3)                                                                      | 93.330(2)                                                                      | 86.840(4)                                                                      |
| <i>γ</i> /°                                          | 90                                                                             | 90                                                                             | 90                                                                             | 79.321(5)                                                                        | 90                                                                             | 90                                                                             | 80.762(4)                                                                      |
| <i>V</i> /Å <sup>3</sup>                             | 1362.38(6)                                                                     | 919.99(7)                                                                      | 5760.2(2)                                                                      | 1979.95(18)                                                                      | 1776.27(9)                                                                     | 1961.44(9)                                                                     | 930.13(8)                                                                      |
| <i>Z</i>                                             | 4                                                                              | 2                                                                              | 8                                                                              | 4                                                                                | 4                                                                              | 4                                                                              | 2                                                                              |
| <i>ρ</i> <sub>calc</sub> g/cm <sup>3</sup>           | 1.33                                                                           | 1.294                                                                          | 1.525                                                                          | 1.953                                                                            | 1.329                                                                          | 1.421                                                                          | 2.068                                                                          |
| <i>μ</i> /mm <sup>-1</sup>                           | 2.421                                                                          | 0.65                                                                           | 7.02                                                                           | 25.092                                                                           | 0.672                                                                          | 2.636                                                                          | 3.399                                                                          |
| <i>F</i> (000)                                       | 568                                                                            | 380                                                                            | 2704                                                                           | 1112                                                                             | 748                                                                            | 876                                                                            | 550.0                                                                          |
| Crystal size/mm <sup>3</sup>                         | 0.051×0.034×0.028                                                              | 0.196×0.066×0.042                                                              | 0.286×0.064×0.056                                                              | 0.181×0.044×0.039                                                                | 0.244×0.111×0.057                                                              | 0.434×0.155×0.138                                                              | 0.20×0.10×0.01                                                                 |
| Radiation                                            | CuKα<br>(λ = 1.54184)                                                          | CuKα<br>(λ = 1.54184)                                                          | CuKα<br>(λ = 1.54184)                                                          | Cu Kα<br>(λ = 1.54184)                                                           | CuKα<br>(λ = 1.54184)                                                          | CuKα<br>(λ = 1.54184)                                                          | MoKα<br>(λ = 0.71073)                                                          |
| 2θ range for data collection/°                       | 10.056 to 149.984                                                              | 7.934 to 150.656                                                               | 7.322 to 151.39                                                                | 4.896 to 90.048                                                                  | 8.08 to 150.192                                                                | 7.314 to 152.622                                                               | 6.58 to 52                                                                     |
| Index ranges                                         | -9 ≤ <i>h</i> ≤ 11,<br>-13 ≤ <i>k</i> ≤ 13,<br>-17 ≤ <i>l</i> ≤ 17             | -6 ≤ <i>h</i> ≤ 5,<br>-27 ≤ <i>k</i> ≤ 27,<br>-10 ≤ <i>l</i> ≤ 10              | -30 ≤ <i>h</i> ≤ 30,<br>-5 ≤ <i>k</i> ≤ 6,<br>-54 ≤ <i>l</i> ≤ 54              | -7 ≤ <i>h</i> ≤ 7,<br>-11 ≤ <i>k</i> ≤ 11,<br>-17 ≤ <i>l</i> ≤ 17                | -8 ≤ <i>h</i> ≤ 6,<br>-13 ≤ <i>k</i> ≤ 13,<br>-26 ≤ <i>l</i> ≤ 27              | -9 ≤ <i>h</i> ≤ 7,<br>-29 ≤ <i>k</i> ≤ 30,<br>-14 ≤ <i>l</i> ≤ 14              | -4 ≤ <i>h</i> ≤ 4,<br>-12 ≤ <i>k</i> ≤ 12,<br>-28 ≤ <i>l</i> ≤ 28              |
| Reflections collected                                | 24984                                                                          | 13294                                                                          | 99682                                                                          | 31524                                                                            | 15068                                                                          | 36258                                                                          | 6834                                                                           |
| Independent reflections                              | 2755<br>[ <i>R</i> <sub>int</sub> = 0.0777,<br><i>R</i> <sub>σ</sub> = 0.0355] | 1927<br>[ <i>R</i> <sub>int</sub> = 0.0806,<br><i>R</i> <sub>σ</sub> = 0.0416] | 5808<br>[ <i>R</i> <sub>int</sub> = 0.1425,<br><i>R</i> <sub>σ</sub> = 0.0371] | 3153<br>[ <i>R</i> <sub>int</sub> = 0.158,<br><i>R</i> <sub>sigma</sub> = 0.089] | 3465<br>[ <i>R</i> <sub>int</sub> = 0.0855,<br><i>R</i> <sub>σ</sub> = 0.0611] | 3996<br>[ <i>R</i> <sub>int</sub> = 0.1463,<br><i>R</i> <sub>σ</sub> = 0.0564] | 6834<br>[ <i>R</i> <sub>int</sub> = 0.0514,<br><i>R</i> <sub>σ</sub> = 0.0593] |
| Data/restraints /parameters                          | 2755/0/173                                                                     | 1927/0/137                                                                     | 5808/0/336                                                                     | 3153/504/489                                                                     | 3465/0/246                                                                     | 3996/0/264                                                                     | 6834/0/245                                                                     |
| Goodness-of-fit on <i>F</i> <sup>2</sup>             | 1.063                                                                          | 1.112                                                                          | 1.089                                                                          | 0.992                                                                            | 1.034                                                                          | 1.074                                                                          | 0.877                                                                          |
| Final <i>R</i> indexes [ <i>I</i> ≥ 2σ ( <i>I</i> )] | <i>R</i> <sub>1</sub> = 0.0394,<br><i>wR</i> <sub>2</sub> = 0.0938             | <i>R</i> <sub>1</sub> = 0.0509,<br><i>wR</i> <sub>2</sub> = 0.1427             | <i>R</i> <sub>1</sub> = 0.0755,<br><i>wR</i> <sub>2</sub> = 0.2033             | <i>R</i> <sub>1</sub> = 0.1055,<br><i>wR</i> <sub>2</sub> = 0.2719               | <i>R</i> <sub>1</sub> = 0.0568,<br><i>wR</i> <sub>2</sub> = 0.1476             | <i>R</i> <sub>1</sub> = 0.0589,<br><i>wR</i> <sub>2</sub> = 0.1612             | <i>R</i> <sub>1</sub> = 0.0355,<br><i>wR</i> <sub>2</sub> = 0.0781             |
| Final <i>R</i> indexes [all data]                    | <i>R</i> <sub>1</sub> = 0.0445,<br><i>wR</i> <sub>2</sub> = 0.0967             | <i>R</i> <sub>1</sub> = 0.0600,<br><i>wR</i> <sub>2</sub> = 0.1585             | <i>R</i> <sub>1</sub> = 0.0801,<br><i>wR</i> <sub>2</sub> = 0.2077             | <i>R</i> <sub>1</sub> = 0.1187,<br><i>wR</i> <sub>2</sub> = 0.2812               | <i>R</i> <sub>1</sub> = 0.0673,<br><i>wR</i> <sub>2</sub> = 0.1590             | <i>R</i> <sub>1</sub> = 0.0657,<br><i>wR</i> <sub>2</sub> = 0.1758             | <i>R</i> <sub>1</sub> = 0.0598,<br><i>wR</i> <sub>2</sub> = 0.0821             |
| Largest diff. peak/hole / e Å <sup>-3</sup>          | 0.30/-0.27                                                                     | 0.26/-0.26                                                                     | 0.53/-0.66                                                                     | 1.91/-1.31                                                                       | 0.30/-0.40                                                                     | 0.47/-0.70                                                                     | 1.19/-0.81                                                                     |

**Table S2.** Summary of TD-DFT results from the model compound 2,4,6-triphenyl-1,2,4,5-tetrazinan-3-one (**A**) (B3LYP / 6-31G\*(df,p) / COSMO(CPCM) (CH<sub>2</sub>Cl<sub>2</sub>)).

| $\lambda / \text{cm}^{-1}$ | $f$    | assignment     | X            | Y            | Z            | N1            | N2H            | C <sub>Ph</sub> H | N3H            | N4            | CO           |
|----------------------------|--------|----------------|--------------|--------------|--------------|---------------|----------------|-------------------|----------------|---------------|--------------|
| <b>A</b>                   |        |                |              |              |              |               |                |                   |                |               |              |
| 34691                      | 0.3636 | HOMO –<br>LUMO | 21→24<br>(3) | 21→24<br>(3) | 0→28<br>(28) | 14→4<br>(-10) | 14→-3<br>(-17) | 1→9<br>(8)        | 14→-2<br>(-16) | 14→4<br>(-10) | 2→12<br>(10) |



**Table S3.** Summary of TD-DFT results from the model compound 1,3,5-triphenyl-6-oxo-verdazyl (**B**) (B3LYP / 6-31G\*(df,p) / COSMO(CPCM) (CH<sub>2</sub>Cl<sub>2</sub>).

| $\lambda / \text{cm}^{-1}$ | $f$    | assignment                                                                          | X             | Y             | Z             | N1            | N2            | C <sub>Ph</sub> | N3            | N4            | CO            |
|----------------------------|--------|-------------------------------------------------------------------------------------|---------------|---------------|---------------|---------------|---------------|-----------------|---------------|---------------|---------------|
| <b>B</b>                   |        |                                                                                     |               |               |               |               |               |                 |               |               |               |
| 18937                      | 0.0495 | $\beta$ -HOMO –<br>$\beta$ -LUMO                                                    | 9→6<br>(-3)   | 9→6<br>(-3)   | 36→7<br>(-29) | 7→12<br>(5)   | 6→26<br>(20)  | 7→3<br>(-4)     | 6→26<br>(20)  | 7→12<br>(5)   | 12→3<br>(-9)  |
| 21606                      | 0.0076 | [ $\beta$ -HOMO-1] –<br>[ $\beta$ -LUMO]                                            | 23→6<br>(-17) | 23→6<br>(-17) | 7→2<br>(-5)   | 2→14<br>(12)  | 12→29<br>(17) | 3→1<br>(-2)     | 12→29<br>(17) | 2→14<br>(12)  | 14→0<br>(-14) |
| 23099                      | 0.0166 | $\alpha$ -HOMO –<br>$\alpha$ -LUMO                                                  | 12→4<br>(-8)  | 1→24<br>(-8)  | 6→38<br>(32)  | 15→3<br>(-12) | 19→9<br>(-10) | 1→16<br>(15)    | 19→9<br>(-10) | 15→3<br>(-12) | 2→15<br>(13)  |
| 29148                      | 0.1831 | $\alpha$ -HOMO –<br>[ $\alpha$ -LUMO+1]                                             | 19→31<br>(12) | 19→31<br>(12) | 10→9<br>(-1)  | 10→4<br>(-6)  | 14→5<br>(-9)  | 1→2<br>(1)      | 14→5<br>(-9)  | 10→4<br>(-6)  | 2→7<br>(5)    |
| 36751                      | 0.2493 | [ $\alpha$ -HOMO-1] –<br>[ $\alpha$ -LUMO]                                          | 12→11<br>(-1) | 12→11<br>(-1) | 51→44<br>(-7) | 4→1<br>(-3)   | 3→5<br>(2)    | 3→10<br>(7)     | 3→5<br>(2)    | 4→1<br>(-3)   | 9→12<br>(3)   |
| 37219                      | 0.2406 | [ $\alpha$ -HOMO-1] –<br>[ $\alpha$ -LUMO]<br>$\beta$ -HOMO –<br>[ $\beta$ -LUMO+1] | 17→20<br>(3)  | 17→20<br>(3)  | 36→35<br>(-1) | 5→1<br>(-4)   | 5→3<br>(-2)   | 3→8<br>(5)      | 5→3<br>(-2)   | 5→1<br>(-4)   | 7→10<br>(3)   |
| <b>[B]<sup>+</sup></b>     |        |                                                                                     |               |               |               |               |               |                 |               |               |               |
| 14259                      | 0.1036 | HOMO –<br>LUMO                                                                      | 11→9<br>(-2)  | 11→9<br>(-2)  | 53→1<br>(-52) | 3→16<br>(13)  | 4→24<br>(20)  | 2→1<br>(-1)     | 4→24<br>(20)  | 3→16<br>(13)  | 9→0<br>(-9)   |
| 19004                      | 0.3711 | [HOMO-3] –<br>LUMO<br>[HOMO-4] –<br>LUMO                                            | 40→9<br>(-31) | 16→1<br>(-15) | 0→16<br>(16)  | 1→24<br>(23)  | 0→1<br>(1)    | 1→24<br>(23)    | 0→16<br>(16)  | 0→0<br>(0)    | 40→9<br>(-31) |
| 19580                      | 0.0325 | [HOMO-5] –<br>LUMO<br>[HOMO-6] –<br>LUMO                                            | 25→9<br>(-16) | 25→9<br>(-16) | 2→1<br>(-1)   | 2→16<br>(14)  | 13→24<br>(11) | 3→1<br>(-2)     | 13→24<br>(11) | 2→16<br>(14)  | 15→0<br>(-15) |
| 22850                      | 0.1002 | [HOMO-5] –                                                                          | 22→9          | 22→9          | 2→1           | 3→16          | 14→24         | 3→1             | 14→24         | 3→16          | 17→0          |

|                        |        |           |       |       |          |       |       |      |       |       |       |
|------------------------|--------|-----------|-------|-------|----------|-------|-------|------|-------|-------|-------|
|                        |        | LUMO      | (-13) | (-13) | (-1)     | (13)  | (10)  | (-2) | (10)  | (13)  | (-17) |
|                        |        | [HOMO-6]- |       |       |          |       |       |      |       |       |       |
|                        |        | LUMO      |       |       |          |       |       |      |       |       |       |
| 33665                  | 0.5114 | HOMO -    | 11→2  | 11→2  | 54→27 (- | 3→1   | 4→7   | 2→21 | 4→7   | 3→1   | 9→33  |
|                        |        | [LUMO+1]  | (-9)  | (-9)  | 27)      | (-2)  | (3)   | (19) | (3)   | (-2)  | (24)  |
| <b>[B]<sup>-</sup></b> |        |           |       |       |          |       |       |      |       |       |       |
| 19428                  | 0.0131 | HOMO -    | 9→5   | 9→5   | 1→58     | 12→0  | 28→6  | 1→8  | 28→6  | 12→0  | 0→13  |
|                        |        | LUMO      | (-4)  | (-4)  | (57)     | (-12) | (-22) | (7)  | (-22) | (-12) | (13)  |
| 22644                  | 0.4037 | HOMO -    | 9→36  | 9→36  |          | 12→1  | 28→1  | 1→2  | 28→1  | 12→1  | 0→13  |
|                        |        | [LUMO+1]  | (27)  | (27)  | 1→10 (9) | (-11) | (-27) | (1)  | (-27) | (-11) | (13)  |
| 24896                  | 0.0794 | HOMO -    | 9→2   | 9→2   | 1→95     | 12→0  | 28→1  | 1→0  | 28→1  | 12→0  | 0→0   |
|                        |        | [LUMO+2]  | (-7)  | (-7)  | (94)     | (-12) | (-27) | (-1) | (-27) | (-12) | (0)   |
| 29048                  | 0.0715 | HOMO -    | 9→45  | 9→45  | 1→3      | 12→3  | 28→1  | 1→1  | 28→1  | 12→3  | 0→-3  |
|                        |        | [LUMO+5]  | (36)  | (36)  | (2)      | (-9)  | (-27) | (0)  | (-27) | (-9)  | (-3)  |
| 36685                  | 0.2834 | [HOMO-1]- | 16→10 | 16→10 | 19→54    | 8→0   | 6→5   | 6→7  | 6→5   | 8→0   | 15→8  |
|                        |        | LUMO      | (-6)  | (-6)  | (35)     | (-8)  | (-1)  | (1)  | (-1)  | (-8)  | (-7)  |

**Table S4.** Summary of TD-DFT results from the model compound 1,5-bis(phenylethynyl)-3-phenyl-6-oxo-verdazyl (**C**) (B3LYP / 6-31G\*(df,p) / COSMO(CPCM) (CH<sub>2</sub>Cl<sub>2</sub>).

| $\lambda / \text{cm}^{-1}$ | $f$    | assignment                                                                                                                            | X              | Y              | Z             | N1           | N2           | C <sub>Ph</sub> | N3           | N4           | CO           |
|----------------------------|--------|---------------------------------------------------------------------------------------------------------------------------------------|----------------|----------------|---------------|--------------|--------------|-----------------|--------------|--------------|--------------|
| <b>C</b>                   |        |                                                                                                                                       |                |                |               |              |              |                 |              |              |              |
| 17104                      | 0.2234 | $\beta$ -HOMO –<br>$\beta$ -LUMO                                                                                                      | 37→11<br>(-26) | 37→11<br>(-26) | 10→2<br>(-8)  | 2→11<br>(9)  | 2→25<br>(23) | 2→2<br>(0)      | 2→25<br>(23) | 2→11<br>(9)  | 5→1<br>(-4)  |
| 18630                      | 0.0464 | [ $\beta$ -HOMO-1] –<br>[ $\beta$ -LUMO]                                                                                              | 44→16<br>(-28) | 44→16<br>(-28) | 1→1<br>(0)    | 1→10<br>(9)  | 3→23<br>(20) | 0→1<br>(1)      | 3→23<br>(20) | 1→10<br>(9)  | 2→1<br>(-1)  |
| 22208                      | 0.3422 | $\alpha$ -HOMO –<br>$\alpha$ -LUMO<br>[ $\beta$ -HOMO-2] –<br>$\beta$ -LUMO                                                           | 27→27<br>(0)   | 27→27<br>(0)   | 15→5<br>(-10) | 6→5<br>(-1)  | 7→12<br>(5)  | 2→2<br>(0)      | 7→12<br>(5)  | 6→5<br>(-1)  | 3→4<br>(1)   |
| 25911                      | 0.4124 | $\alpha$ -HOMO –<br>$\alpha$ -LUMO<br>$\alpha$ -HOMO –<br>[ $\alpha$ -LUMO+2]                                                         | 27→30<br>(3)   | 27→30<br>(3)   | 4→16<br>(12)  | 8→1<br>(-7)  | 11→4<br>(-7) | 1→6<br>(5)      | 11→4<br>(-7) | 8→1<br>(-7)  | 1→7<br>(6)   |
| 31686                      | 1.0785 | [ $\alpha$ -HOMO-2] –<br>$\alpha$ -LUMO<br>[ $\alpha$ -HOMO-1] –<br>[ $\alpha$ -LUMO+1]<br>[ $\beta$ -HOMO-1] –<br>[ $\beta$ -LUMO+1] | 44→44<br>(0)   | 44→44<br>(0)   | 1→1<br>(0)    | 1→1<br>(0)   | 4→2<br>(-2)  | 0→1<br>(1)      | 4→2<br>(-2)  | 1→1<br>(0)   | 1→6<br>(5)   |
| <b>[C]<sup>+</sup></b>     |        |                                                                                                                                       |                |                |               |              |              |                 |              |              |              |
| 10368                      | 1.1694 | HOMO – LUMO                                                                                                                           | 47→14<br>(-33) | 47→14<br>(-33) | 2→0<br>(-2)   | 0→14<br>(14) | 0→21<br>(21) | 1→1<br>(0)      | 0→21<br>(21) | 0→14<br>(14) | 3→0<br>(-3)  |
| 13333                      | 0.2112 | [HOMO-1] –<br>LUMO                                                                                                                    | 43→14<br>(-29) | 43→14<br>(-29) | 1→1<br>(0)    | 1→14<br>(13) | 5→21<br>(16) | 0→1<br>(1)      | 5→21<br>(16) | 1→14<br>(13) | 0→0<br>(0)   |
| 29186                      | 0.3221 | [HOMO-1] –<br>[LUMO+1]                                                                                                                | 43→16<br>(-27) | 43→16<br>(-27) | 1→14<br>(13)  | 1→1<br>(0)   | 5→5<br>(0)   | 0→11<br>(11)    | 5→5<br>(0)   | 1→1<br>(0)   | 1→31<br>(30) |
| 29531                      | 0.2022 | [HOMO-13] –                                                                                                                           | 30→16          | 30→16          | 12→1          | 5→13         | 1→20         | 7→1             | 1→20         | 5→13         | 10→1         |

|       |        |             |       |       |       |       |       |      |       |       |      |
|-------|--------|-------------|-------|-------|-------|-------|-------|------|-------|-------|------|
| 30346 | 0.3805 | LUMO        | (-14) | (-14) | (-11) | (8)   | (19)  | (-6) | (19)  | (8)   | (-9) |
|       |        | HOMO –      | 46→30 | 46→30 | 2→19  | 0→0   | 1→4   | 1→10 | 1→4   | 0→0   | 3→2  |
|       |        | [LUMO+2]    | (-16) | (-16) | (17)  | (0)   | (3)   | (9)  | (3)   | (0)   | (-1) |
| [C]   |        |             |       |       |       |       |       |      |       |       |      |
| 16018 | 0.9501 | HOMO – LUMO | 12→46 | 12→46 | 1→1   | 11→0  | 26→0  | 1→0  | 26→0  | 11→0  | 0→6  |
|       |        |             | (34)  | (34)  | (0)   | (-11) | (-26) | (-1) | (-26) | (-11) | (6)  |
| 19420 | 0.1739 | HOMO –      | 12→48 | 12→48 | 1→1   | 11→2  | 26→1  | 1→0  | 26→1  | 11→2  | 0→-1 |
|       |        | [LUMO+1]    | (36)  | (36)  | (0)   | (-9)  | (-25) | (-1) | (-25) | (-9)  | (-1) |
| 20725 | 0.1362 | HOMO –      | 12→5  | 12→5  | 1→61  | 11→0  | 26→6  | 1→9  | 26→6  | 11→0  | 0→9  |
|       |        | [LUMO+2]    | (-7)  | (-7)  | (60)  | (-11) | (-20) | (8)  | (-20) | (-11) | (9)  |
| 30534 | 1.5889 | [HOMO-2] –  | 40→47 | 40→47 | 2→0   | 1→0   | 6→0   | 1→0  | 6→0   | 1→0   | 3→5  |
|       |        | LUMO        | (7)   | (7)   | (-2)  | (-1)  | (-6)  | (-1) | (-6)  | (-1)  | (2)  |

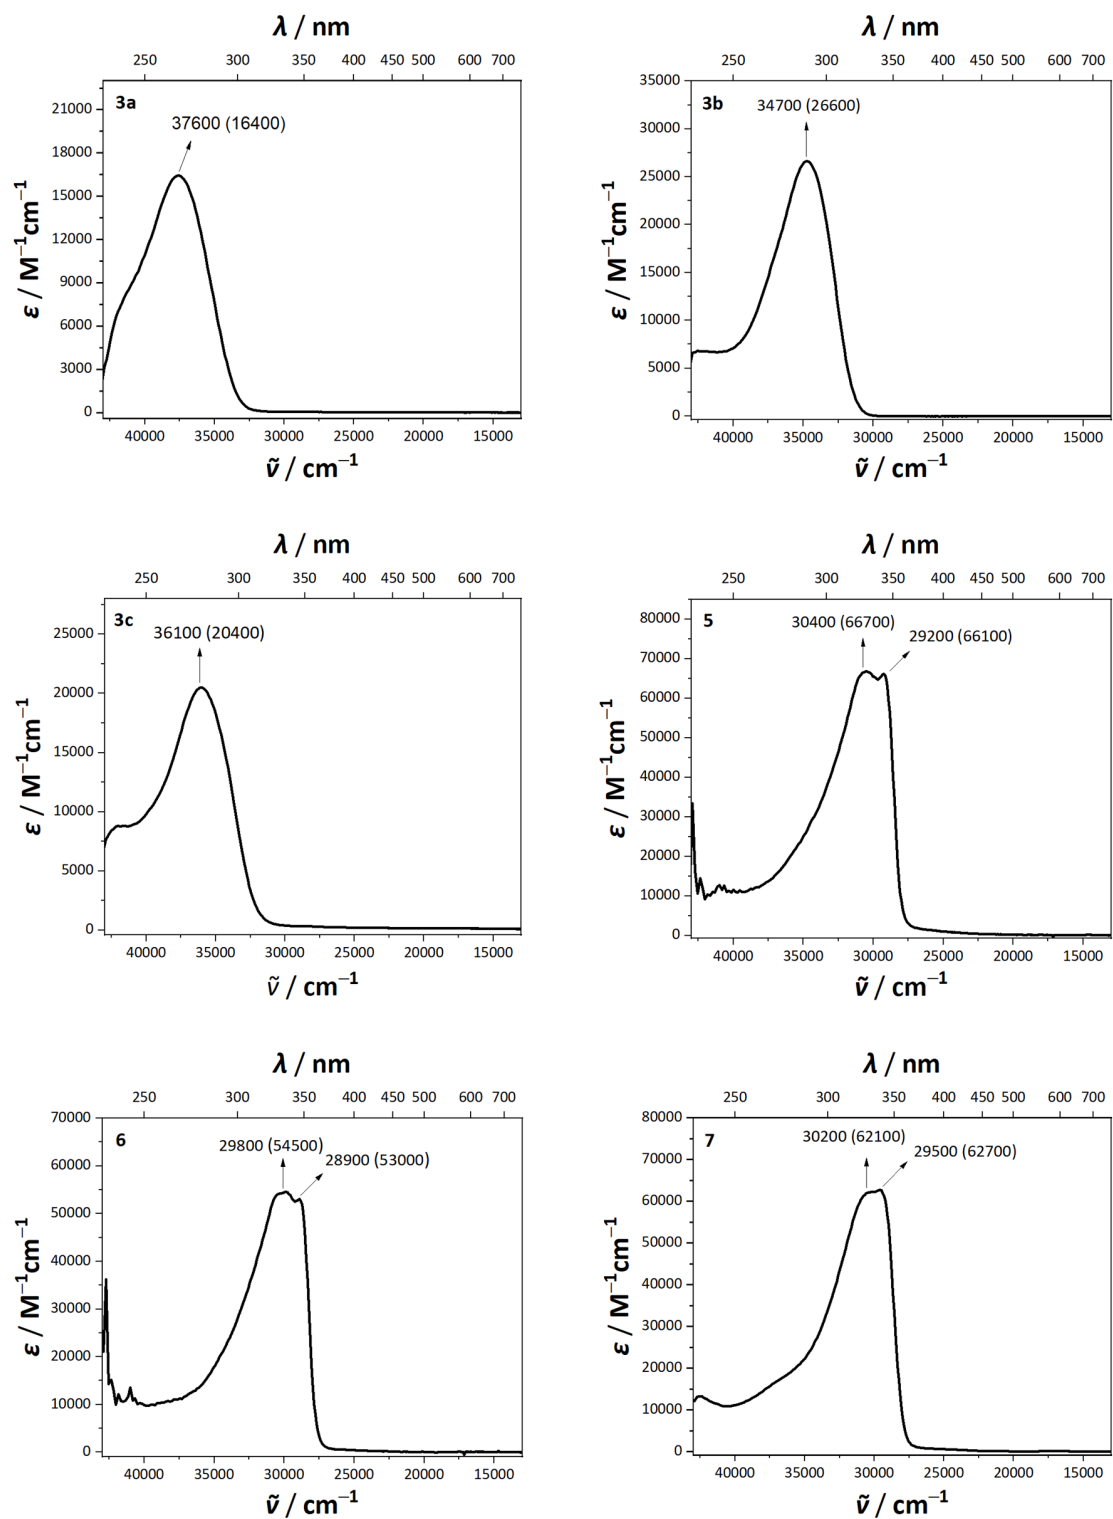

**Figure S6.** The UV-vis spectra ( $\tilde{\nu}_{max} / cm^{-1}$  ( $\epsilon / M^{-1}cm^{-1}$ )) of tetrazines **3a – c**, **5**, **6** and **7**.

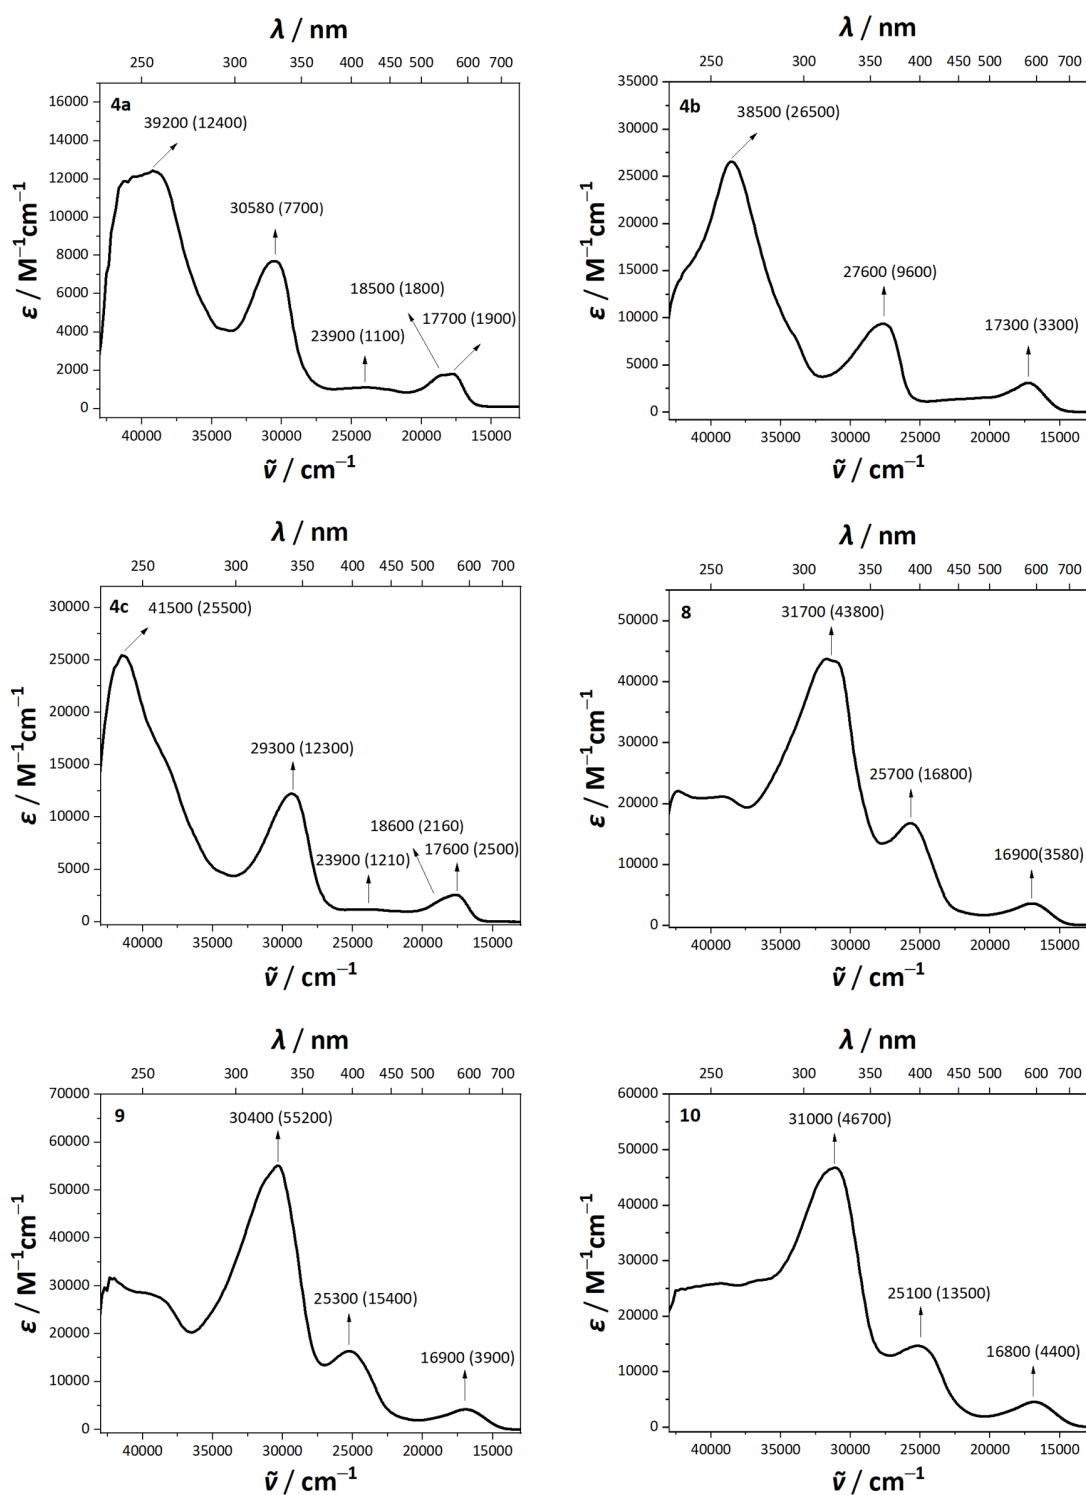

**Figure S7.** The UV-vis spectra ( $\tilde{\nu}_{max} / \text{cm}^{-1}$  ( $\epsilon / \text{M}^{-1}\text{cm}^{-1}$ )) of verdazyls **4a – c**, **8**, **9** and **10**.

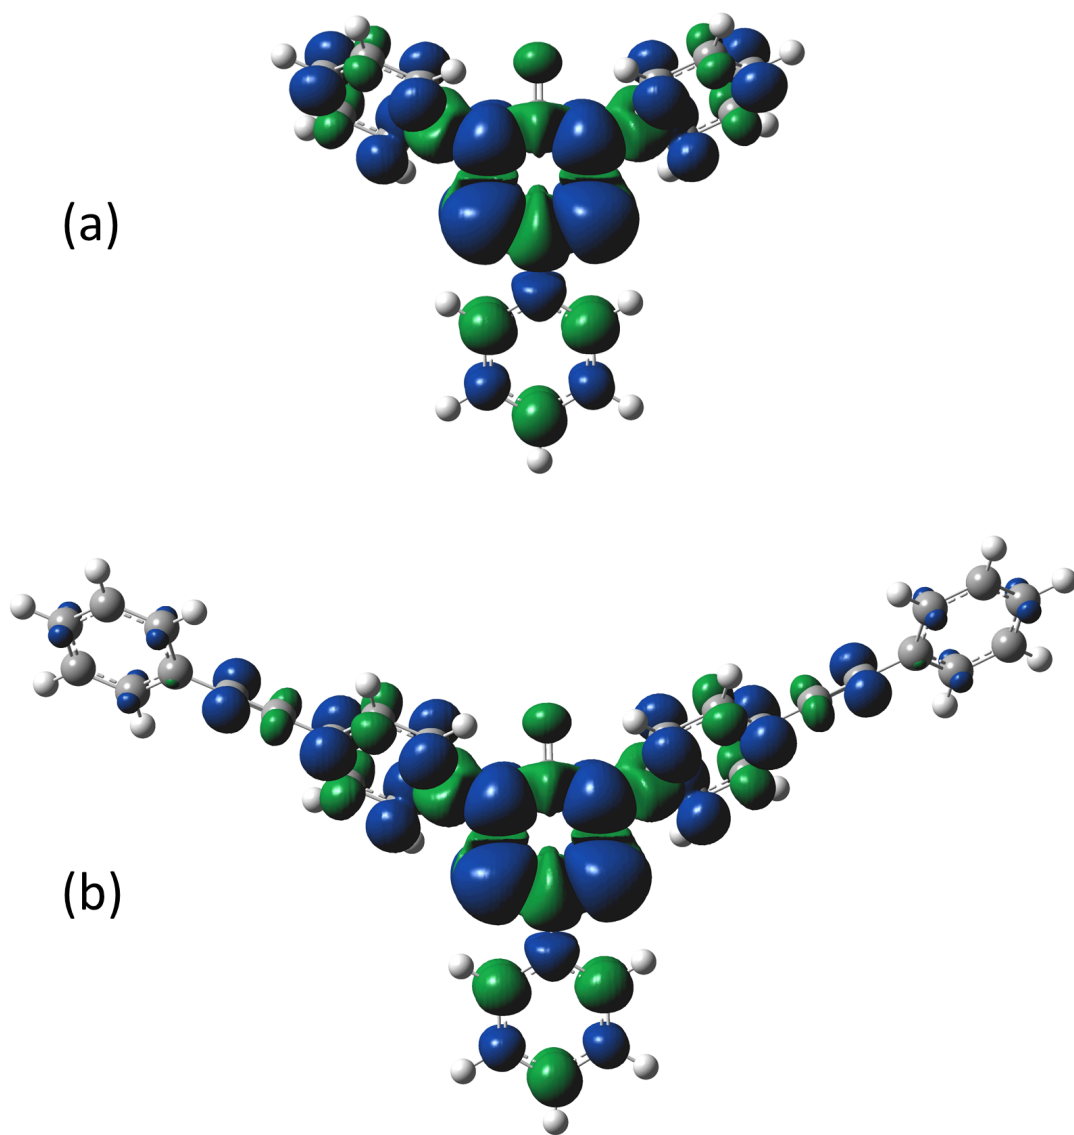

**Figure S8.** Plots of the spin density from the model verdazyl radical (a) [B] (b) [C]

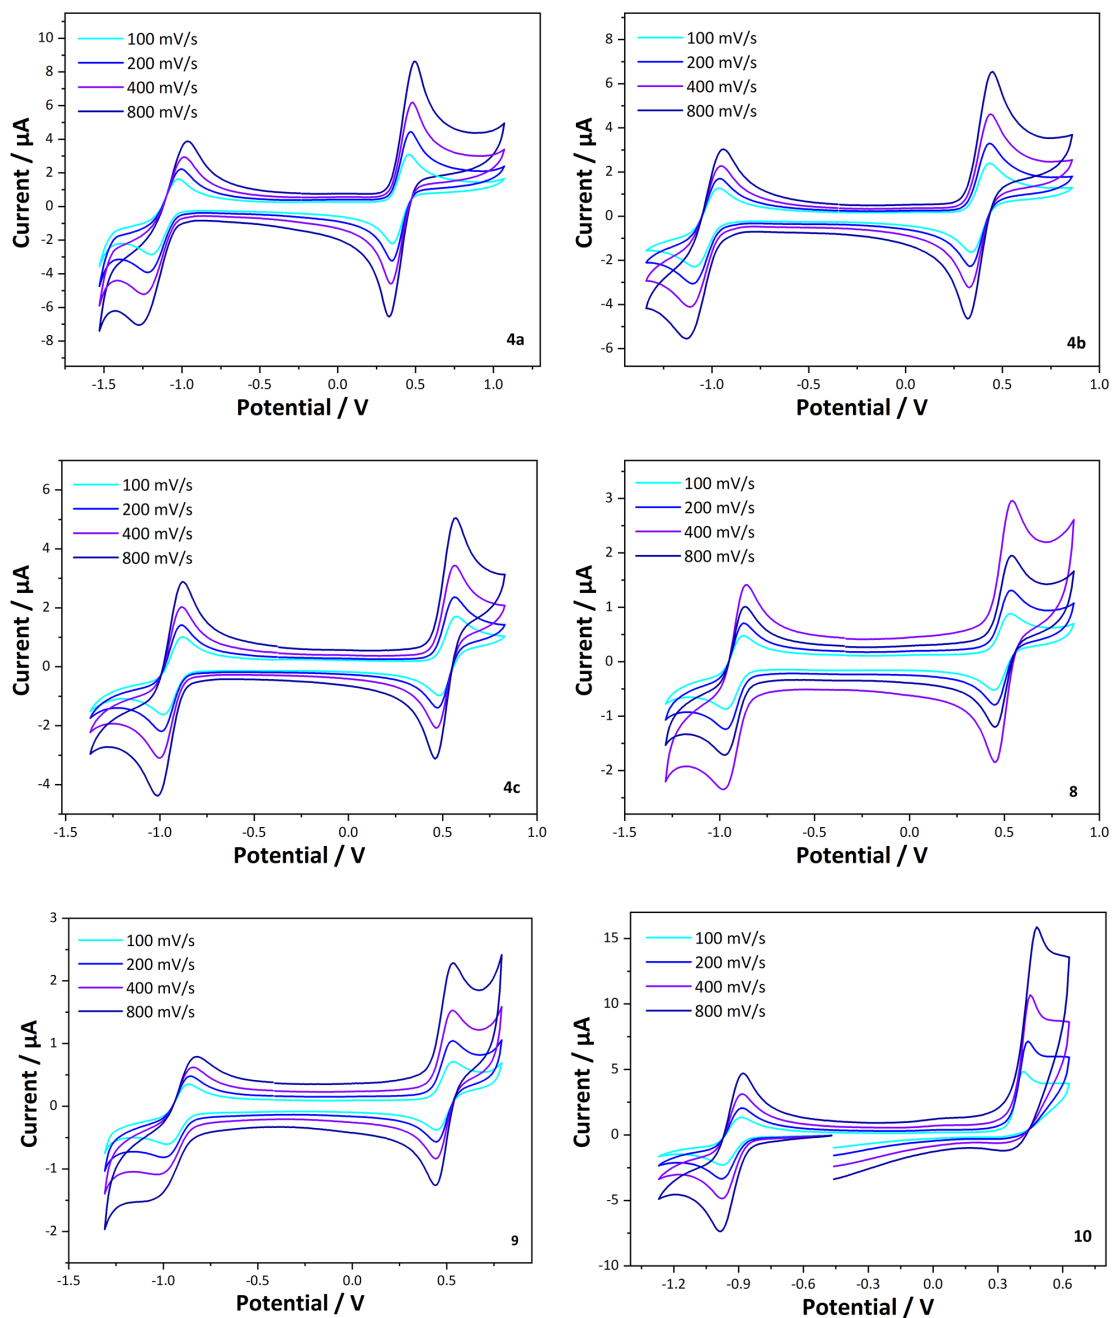

**Figure S9.** Cyclic Voltammograms of compounds **4a – c** and **8 – 10** in 0.1 M  $\text{NBu}_4\text{PF}_6 / \text{CH}_2\text{Cl}_2$  solution. Voltammograms are plotted vs ferrocene/ferrocenium ( $E_{1/2} = 0 \text{ V}$ ) from data collected against a decamethylferrocene / decamethylferrocenium internal reference couple ( $E_{1/2} = -0.55 \text{ V}$ ).



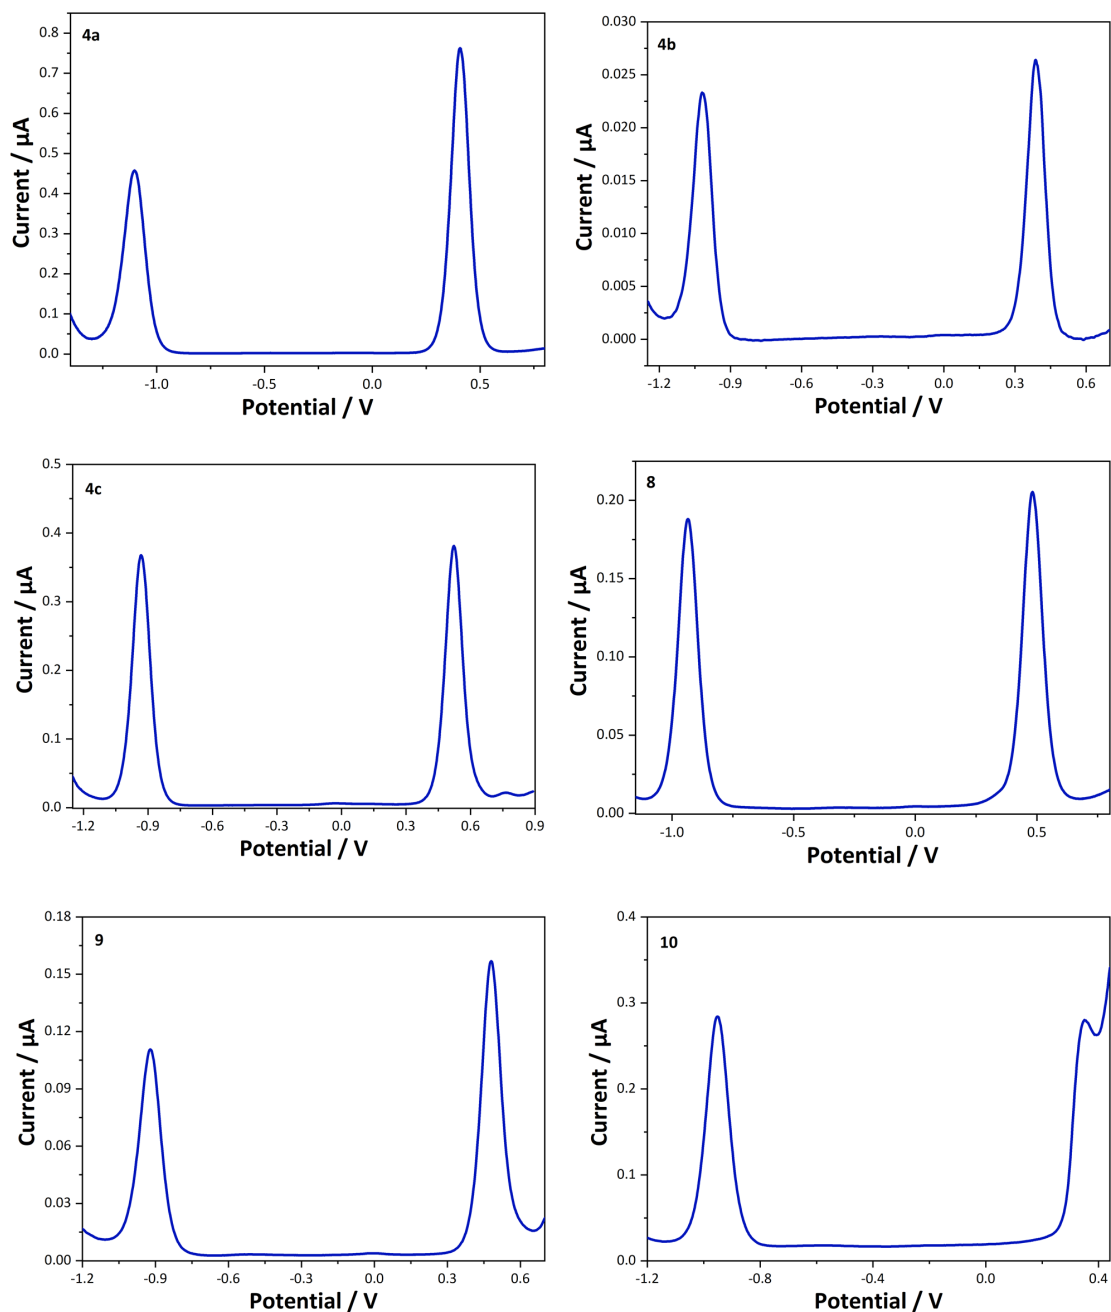

**Figure S10.** Square Wave Voltammograms of compounds **4a** – **c** and **8** – **10** in 0.1 M  $\text{NBu}_4\text{PF}_6 / \text{CH}_2\text{Cl}_2$  solution. Voltammograms are plotted vs ferrocene/ferrocenium ( $E_{1/2} = 0$  V) from data collected against a decamethylferrocene / decamethylferrocenium internal reference couple ( $E_{1/2} = -0.55$  V).

**Table S5.** Summary of UV-vis-NIR spectroelectrochemical data for compounds **4a-c**, **9** and **10**.

| Compound  | Experimental $\nu$ / $\text{cm}^{-1}$ ( $\epsilon$ / $\text{dm}^3 \text{mol}^{-1} \text{cm}^{-1}$ ) |                                                                   |                                |
|-----------|-----------------------------------------------------------------------------------------------------|-------------------------------------------------------------------|--------------------------------|
|           | $[\text{x}]^+$                                                                                      | $[\text{x}]$                                                      | $[\text{x}]^-$                 |
| <b>4a</b> | 21460 (5200),<br>15800 (10300)                                                                      | 39200 (14000),<br>30580 (7700),<br>18500 (1800),<br>17700 (1900)  | 38400 (17500),<br>26900 (4800) |
| <b>4b</b> | 36900 (23900),<br>15400 (8400),<br>11860 (16800)                                                    | 38500 (26500),<br>27600 (9600),<br>17300 (3300)                   | 36900 (22500),<br>25000 (6600) |
| <b>4c</b> | 40500 (20400),<br>18900 (7080),<br>15360 (13020)                                                    | 41500 (25500),<br>29300 (12300),<br>18600 (2160),<br>17600 (2500) | 25300 (10300)                  |
| <b>9</b>  | 30300 (44900),<br>11600 (9400)                                                                      | 30400 (55200),<br>25300 (15400),<br>16900 (3900)                  | 30300 (75300)                  |
| <b>10</b> | —                                                                                                   | 31000 (46700),<br>25100 (13500),<br>16800 (4400)                  | 30800(53400)                   |

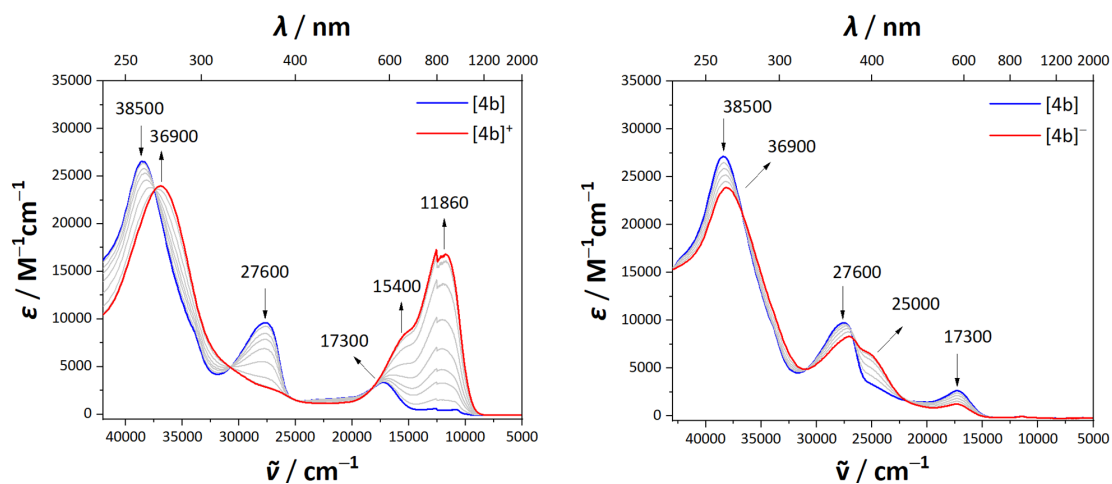

Figure S11. Plots of spectroelectrochemical data of **4b** in the UV-vis-NIR region.

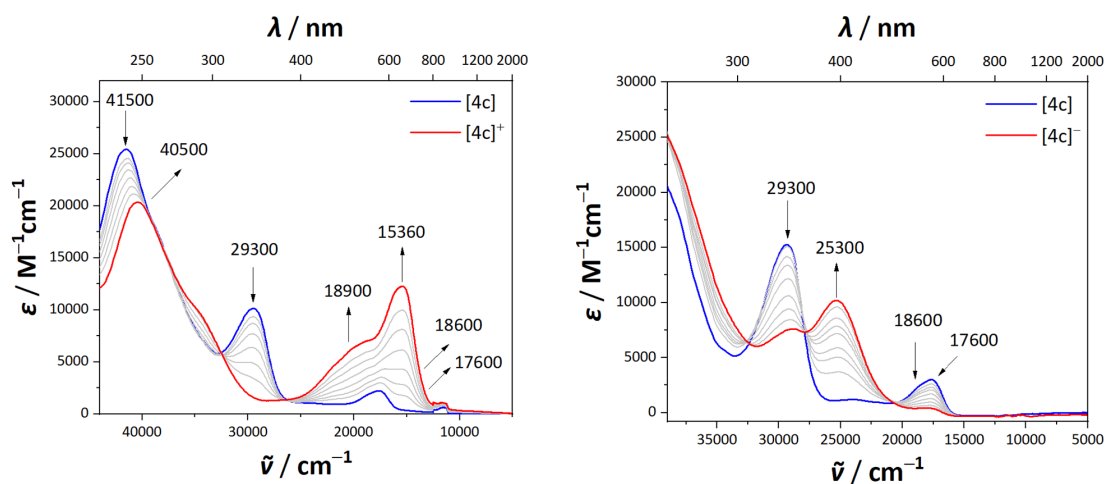

Figure S12. Plots of spectroelectrochemical data of **4c** in the UV-vis-NIR region.

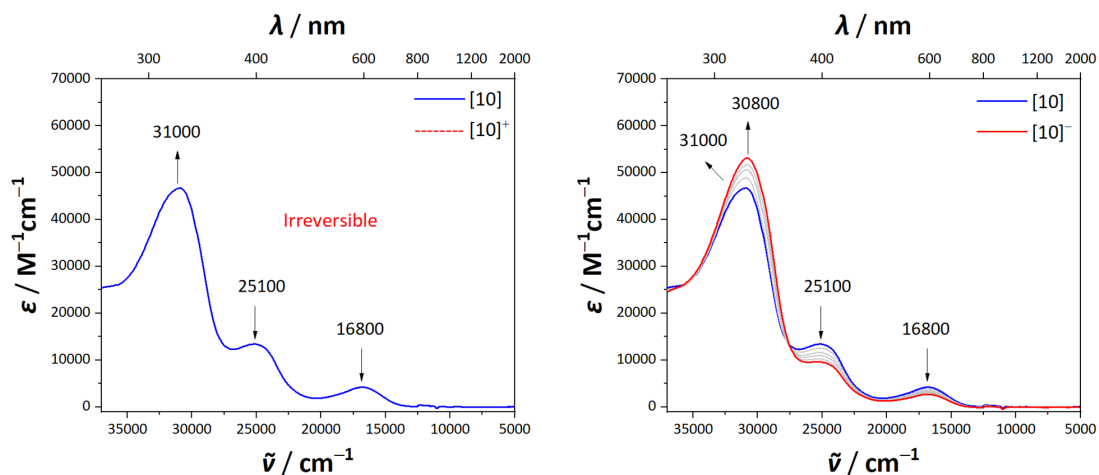

Figure S13. The spectroelectrochemically generated spectra of  $[10]^-$ .

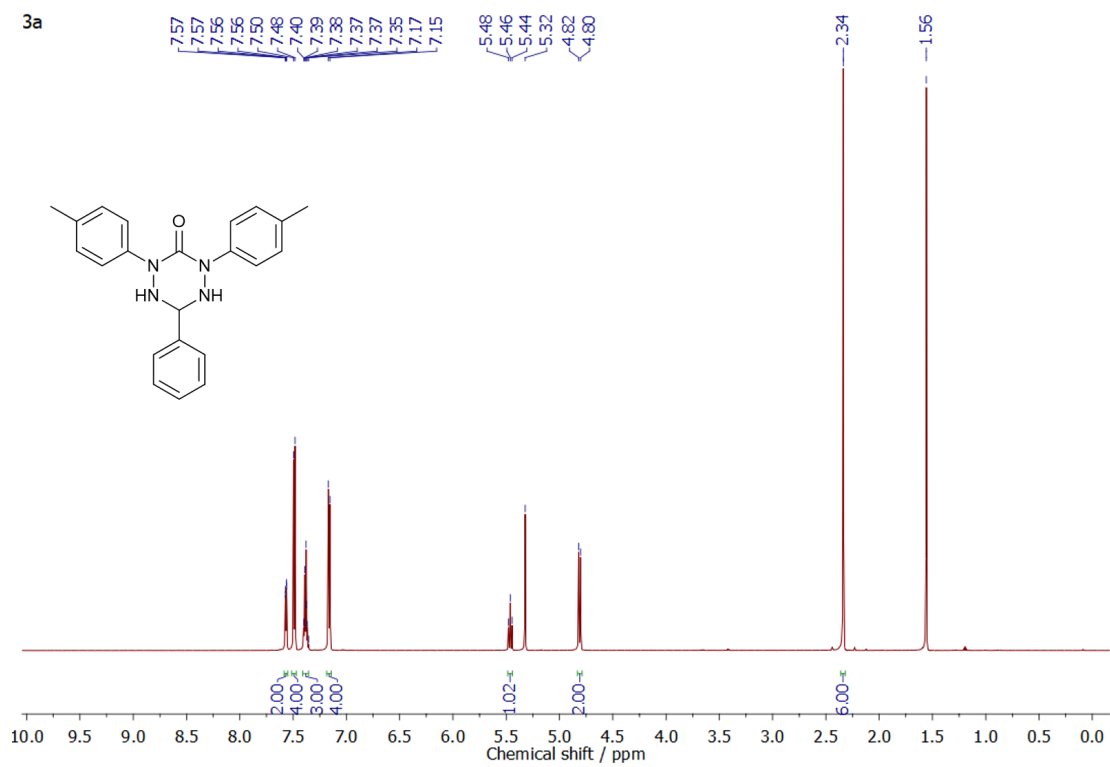

**Figure S14.** The  $^1\text{H}$  NMR spectrum of **3a**.

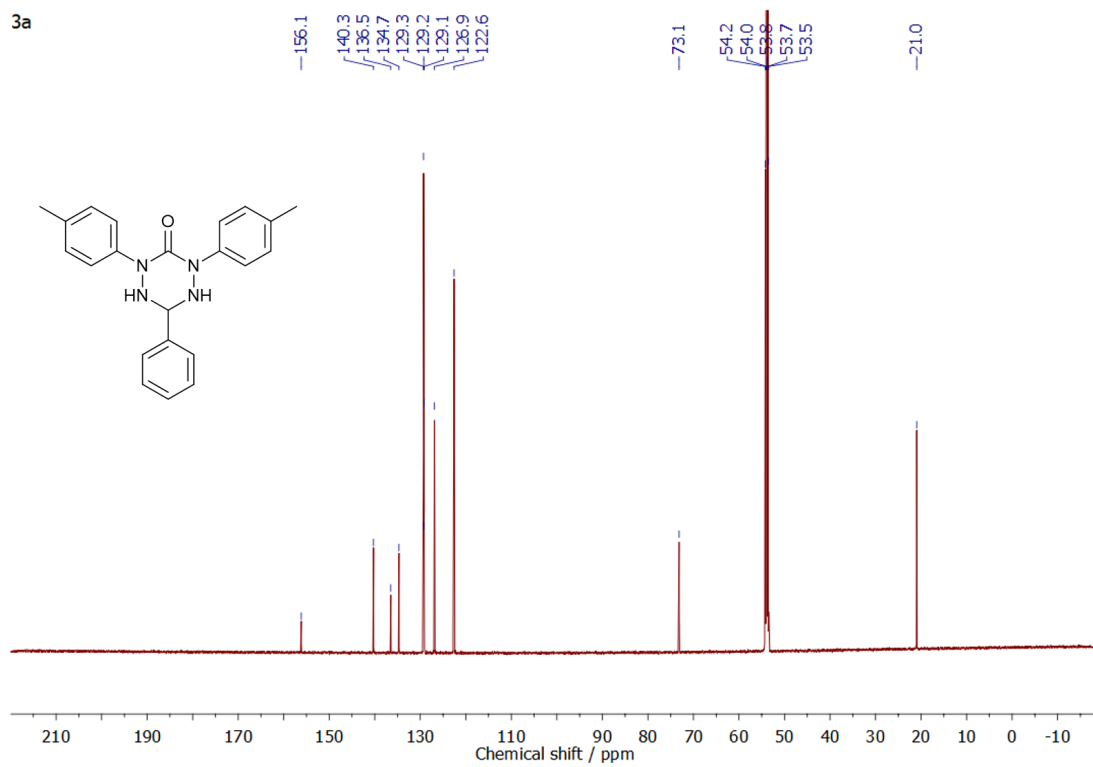

Figure S15. The  $^{13}\text{C}\{^1\text{H}\}$  NMR spectrum of **3a**.

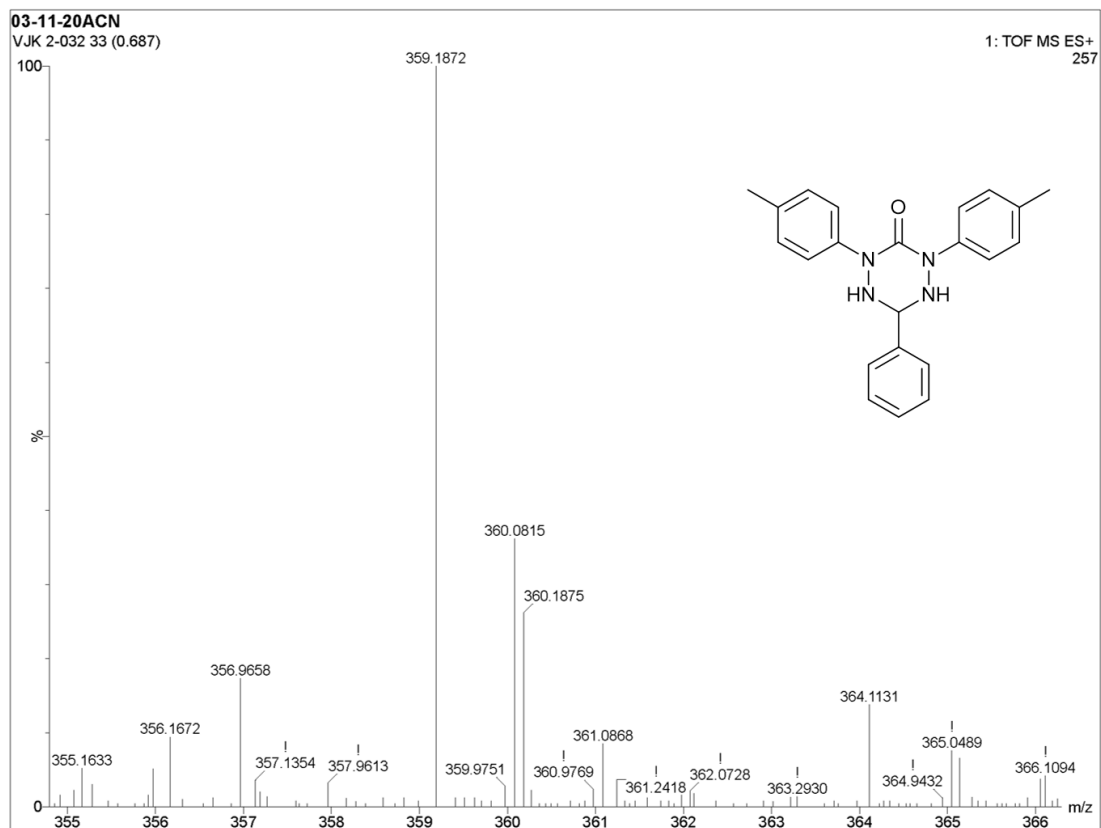

**Figure S16.** The mass spectrum of **3a**.

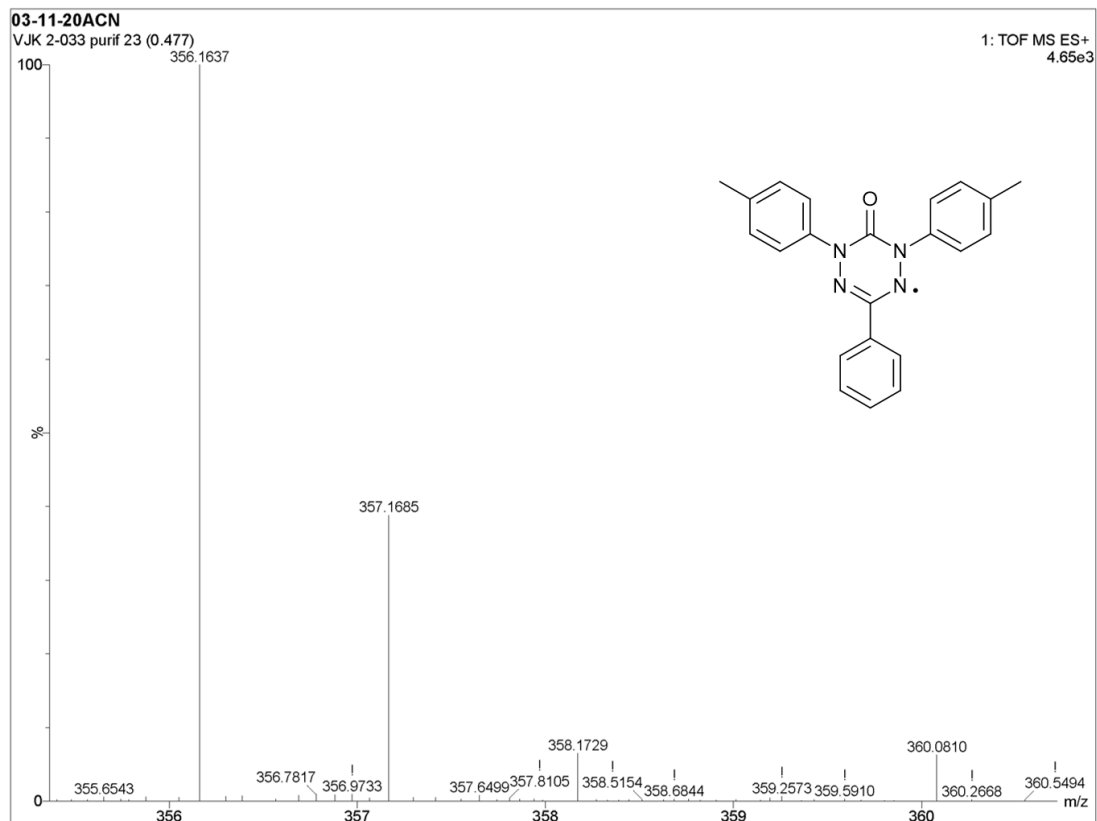

**Figure S17.** The mass spectrum of **4a**.

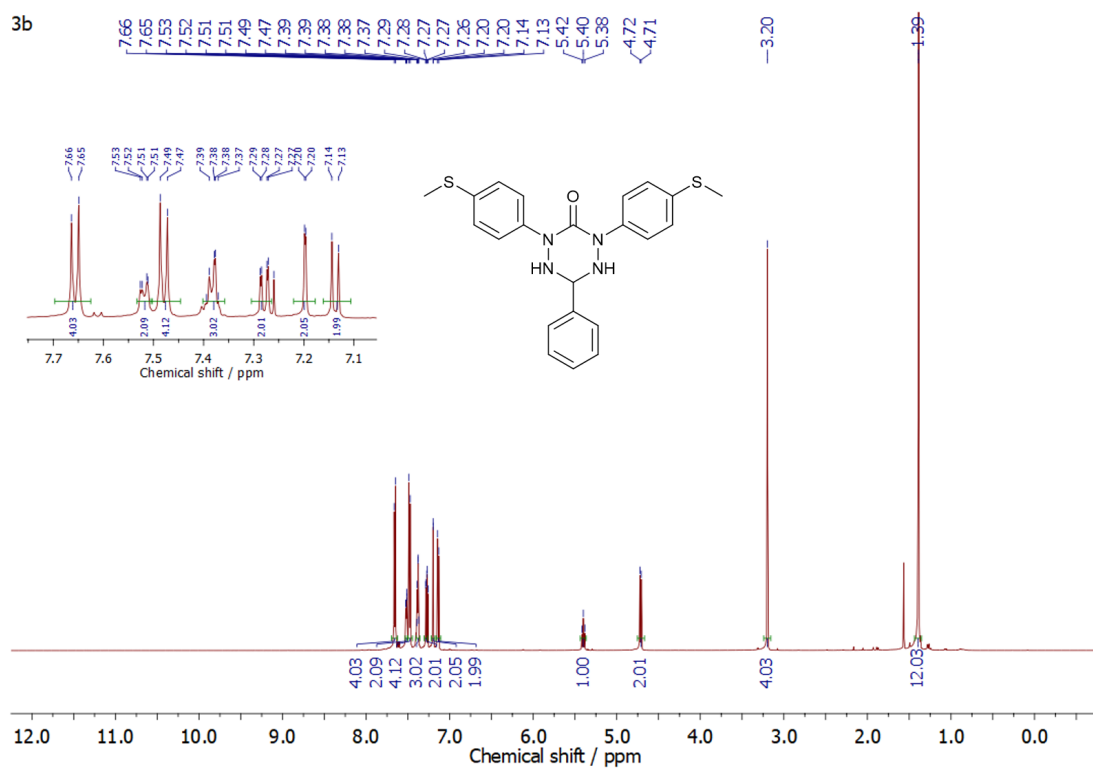

**Figure S18.** The  $^1\text{H}$  NMR spectrum of **3b**. The inset shows an expansion of the aromatic region for clarity.



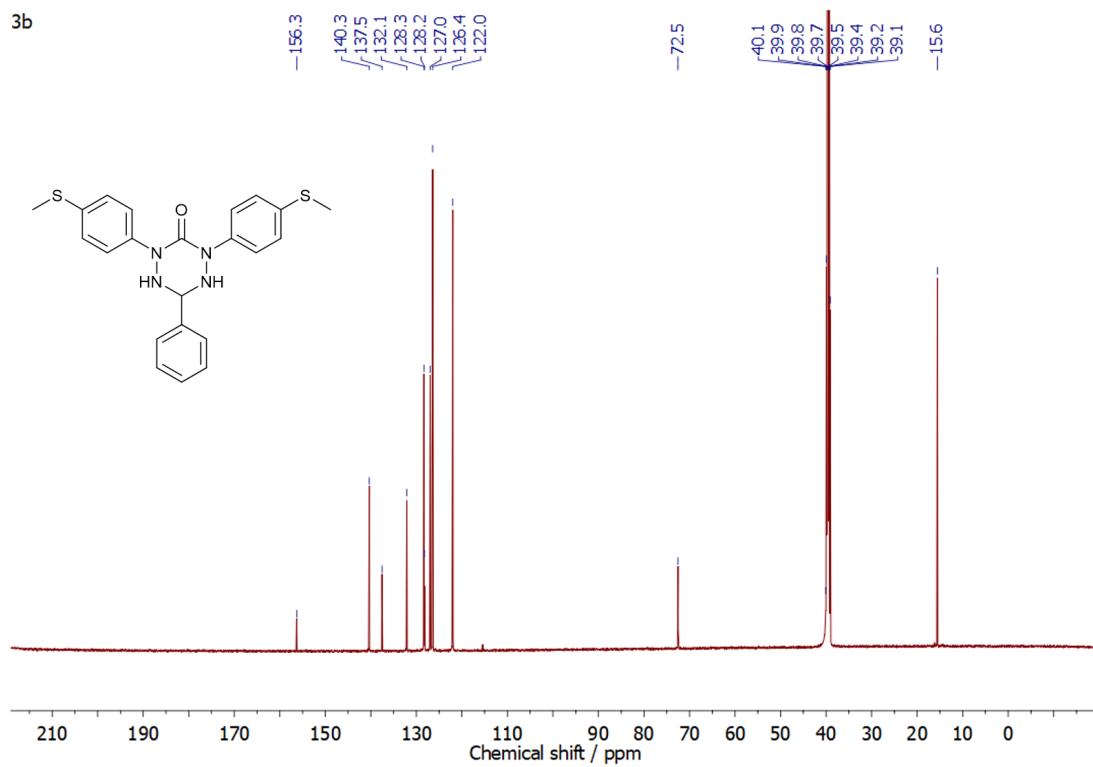

**Figure S19.** The  $^{13}\text{C}\{^1\text{H}\}$  NMR spectrum of **3b**.

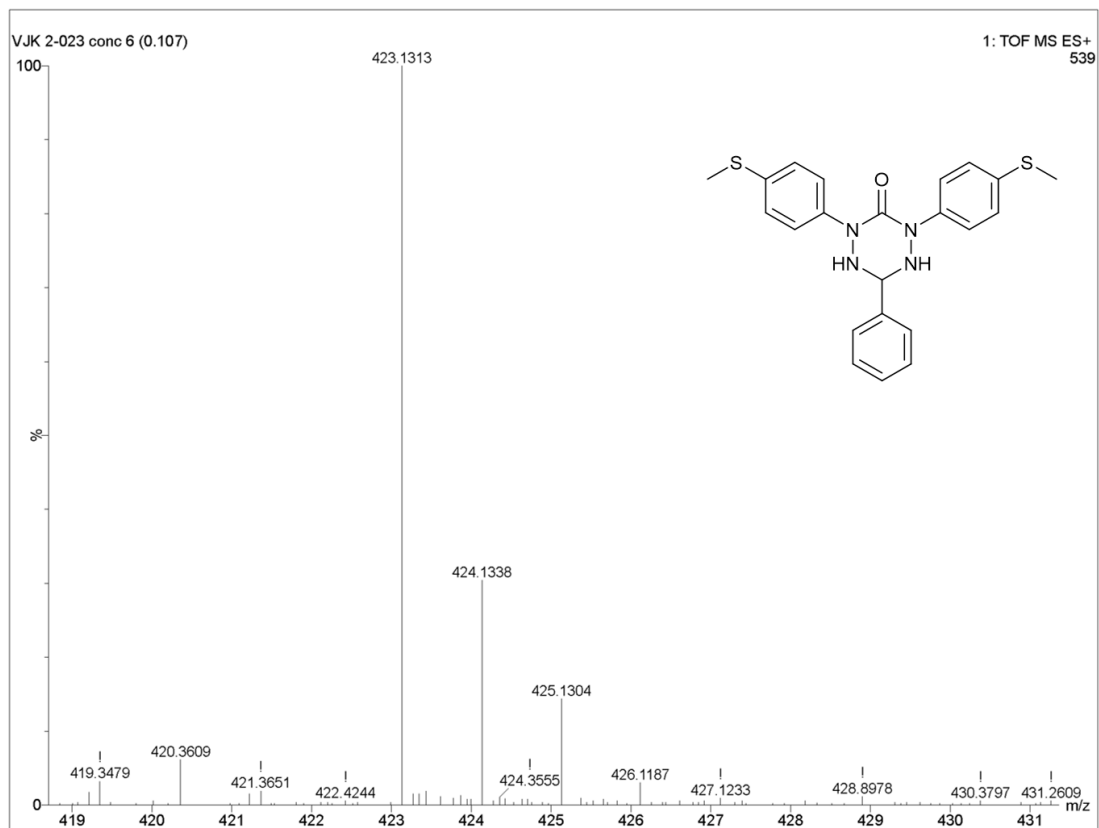

**Figure S20.** The mass spectrum of **3b**.

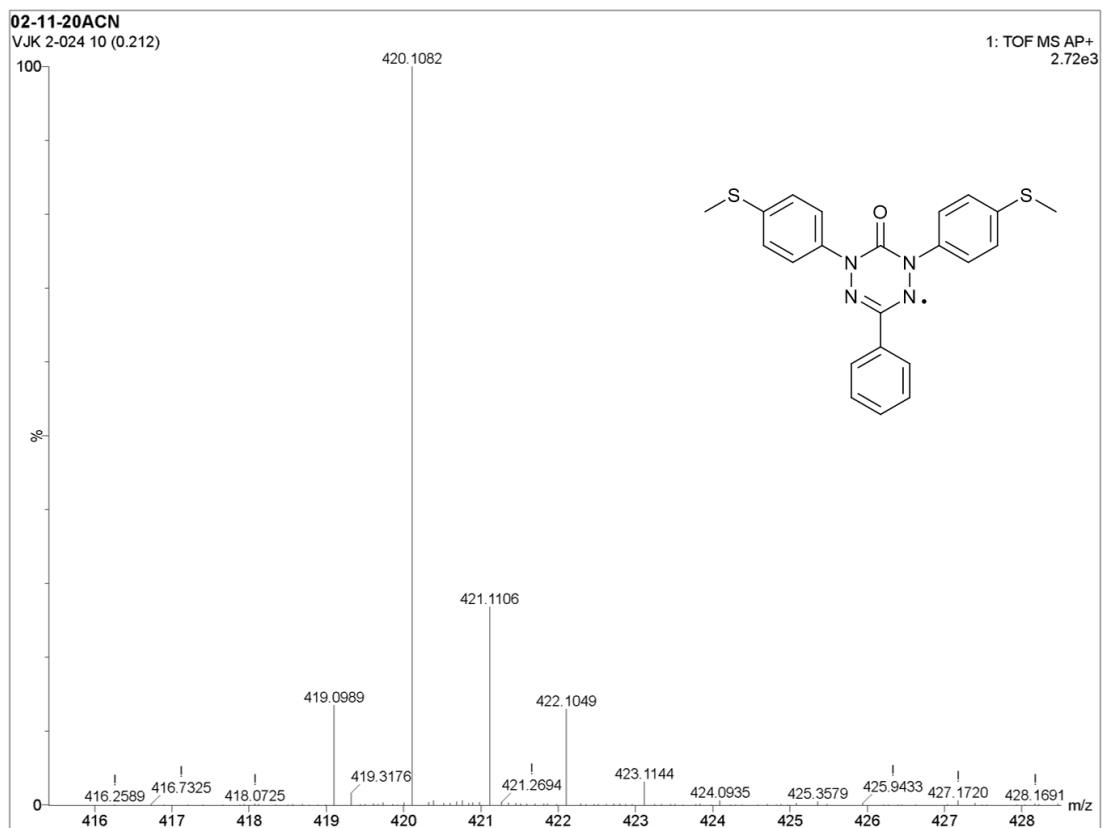

**Figure S21.** The mass spectrum of **4b**.

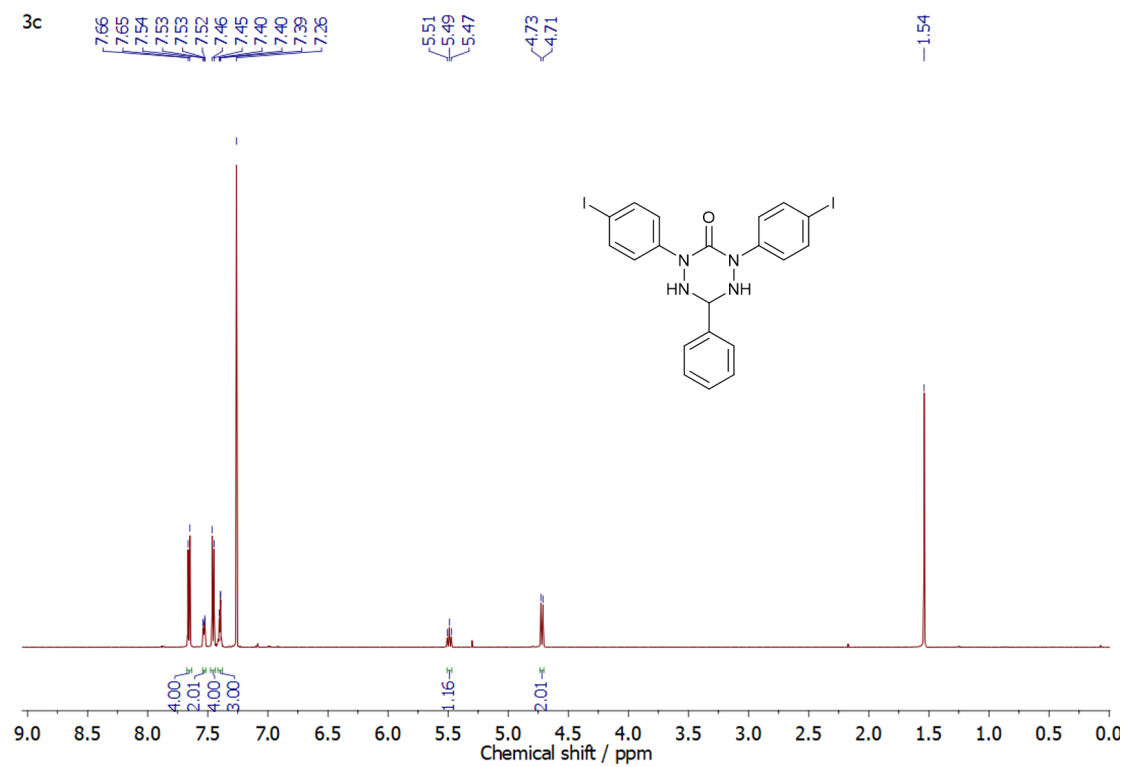

**Figure S22.** The  $^1\text{H}$  NMR spectrum of **3c**. The inset shows an expansion of the aromatic region for clarity.

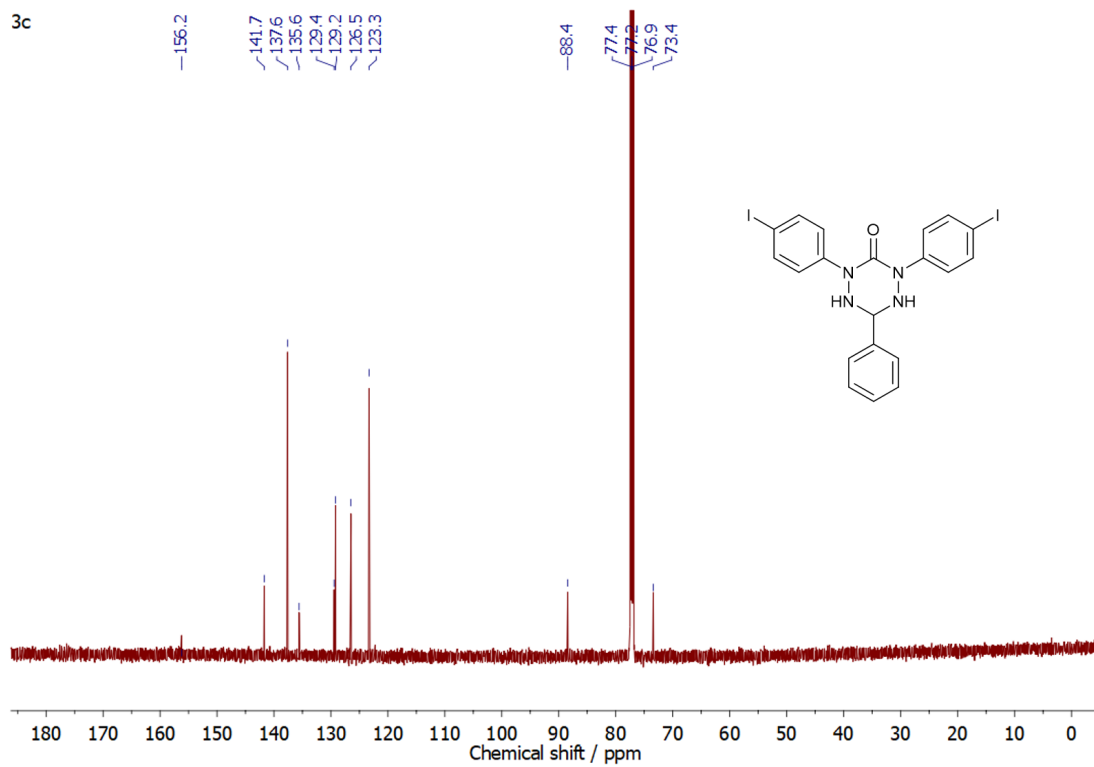

**Figure S23.** The  $^{13}\text{C}\{^1\text{H}\}$  NMR spectrum of **3c**.

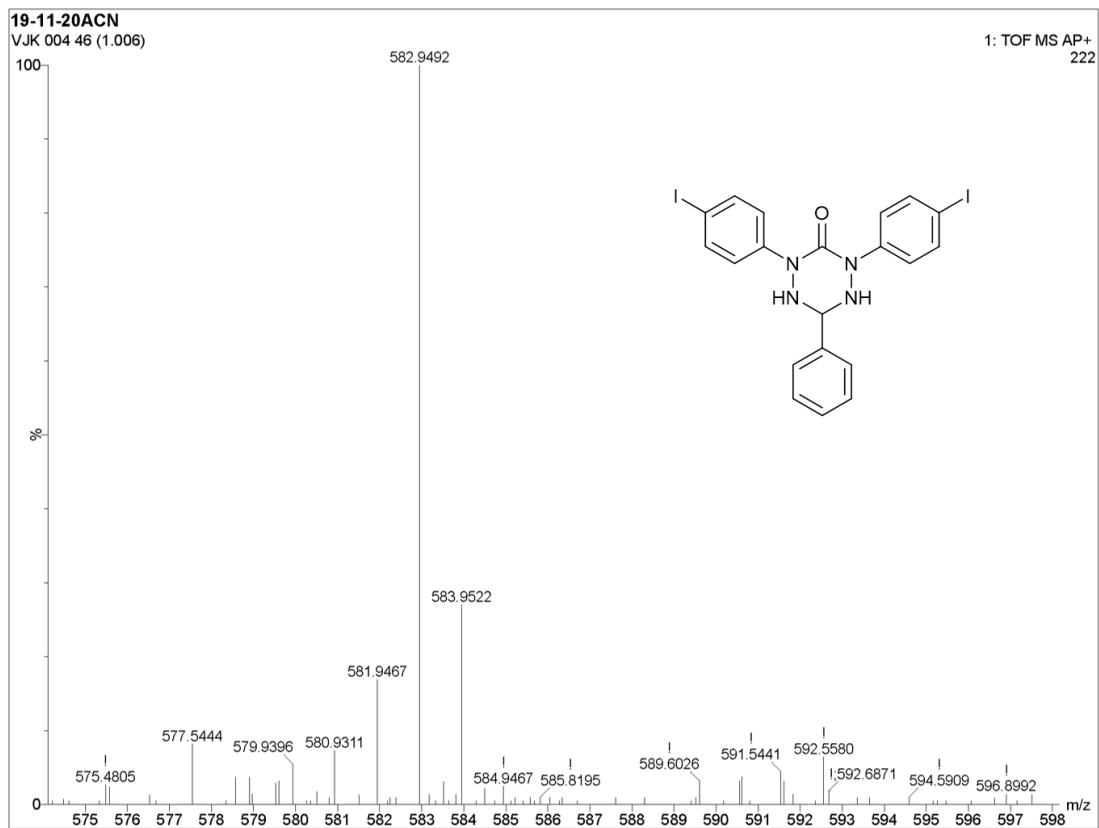

**Figure S24.** The mass spectrum of **3c**.

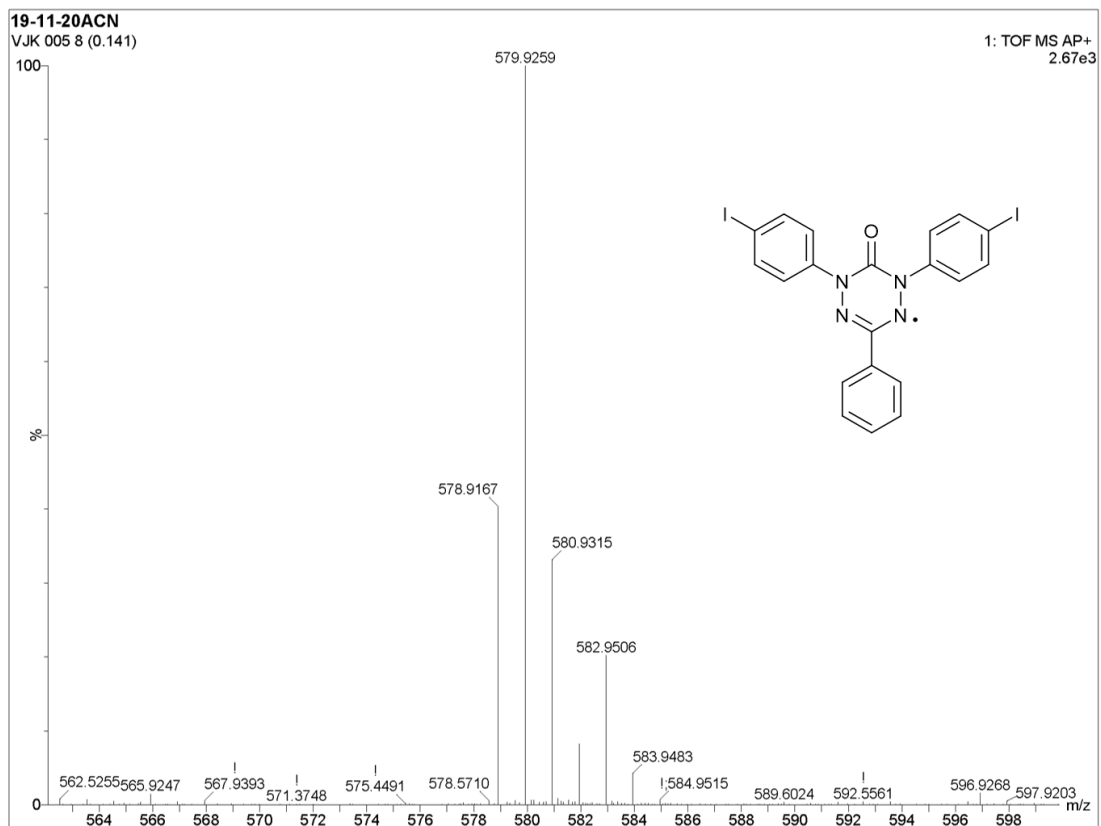

Figure S25. The mass spectrum of 4c.

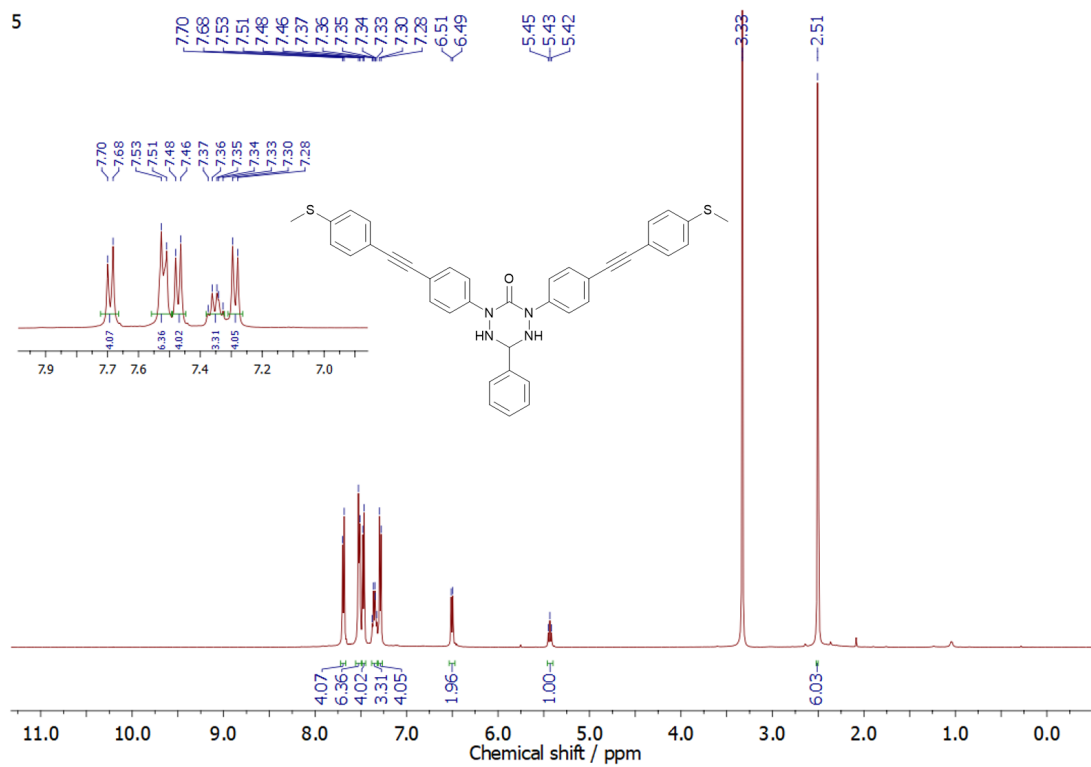

**Figure S26.** The  $^1\text{H}$  NMR spectrum of **5**. The inset shows an expansion of the aromatic region for clarity.



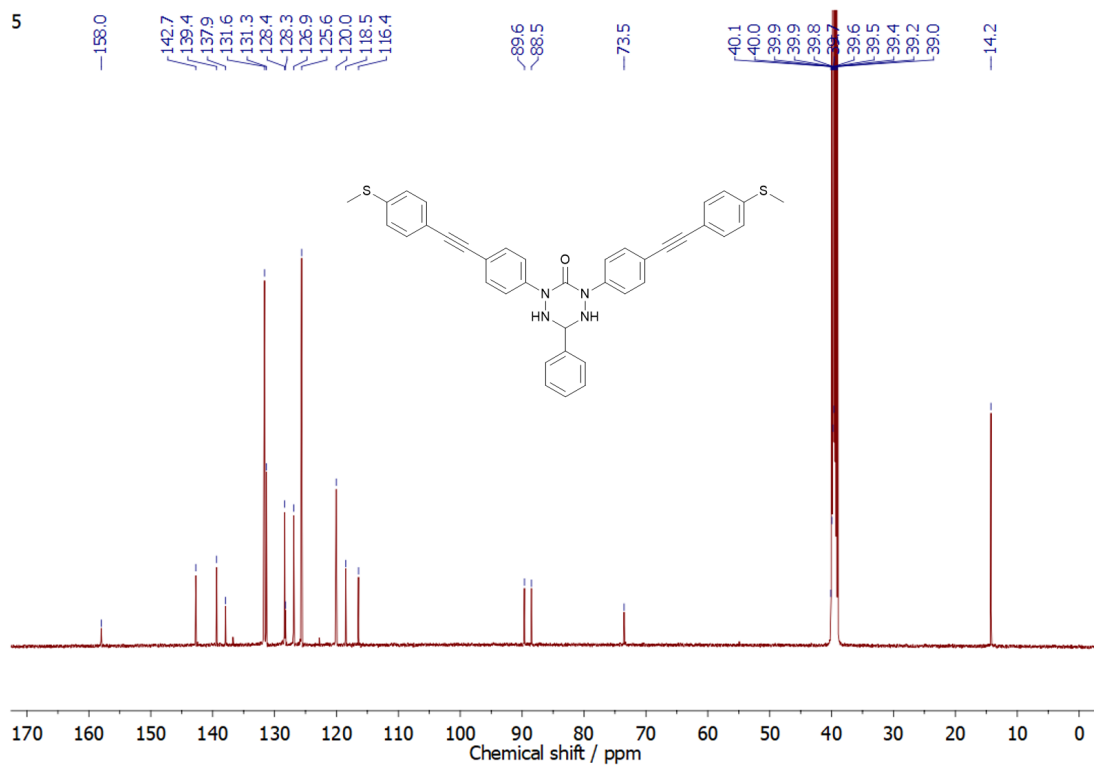

Figure S27. The  $^{13}\text{C}\{^1\text{H}\}$  NMR spectrum of 5.

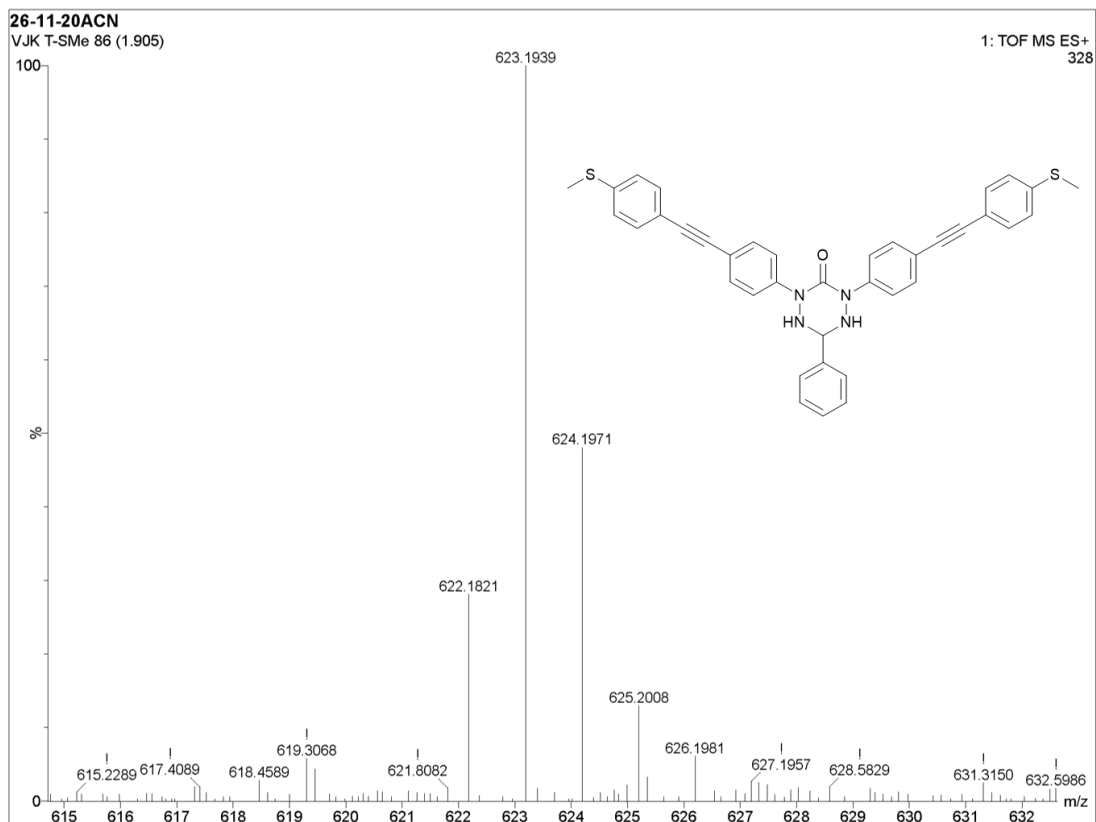

Figure S28. The mass spectrum of 5.

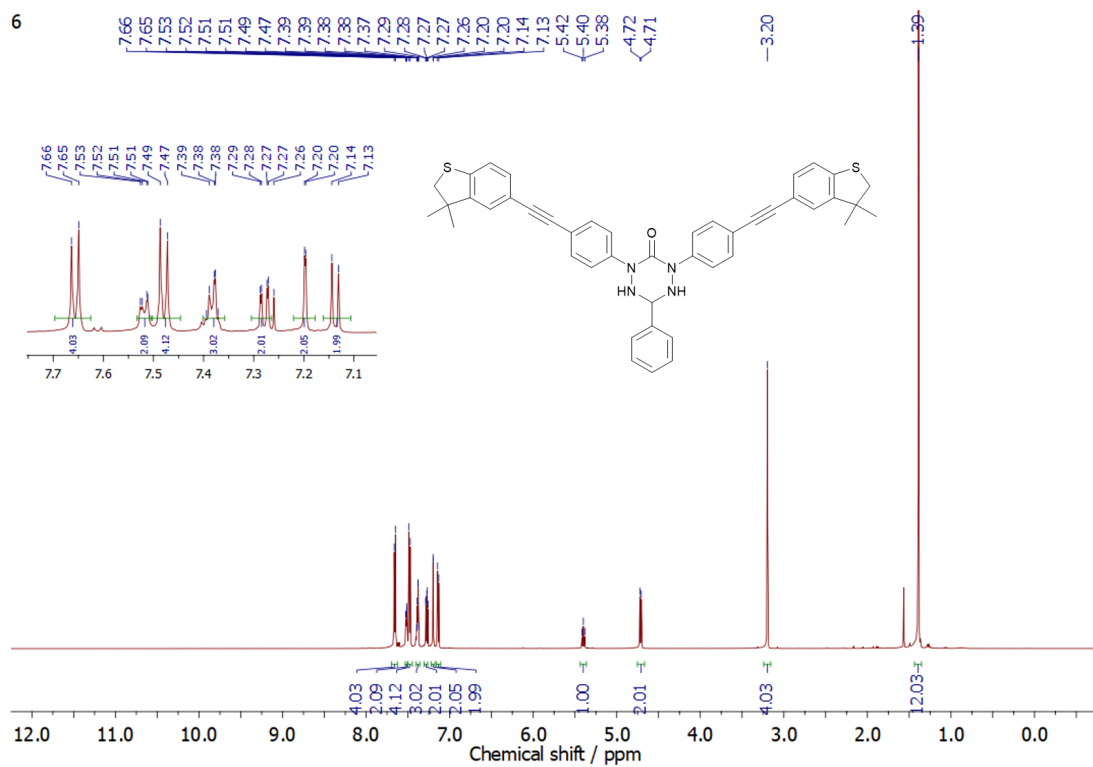

**Figure S29.** The  $^1\text{H}$  NMR spectrum of **6**. The inset shows an expansion of the aromatic region for clarity.

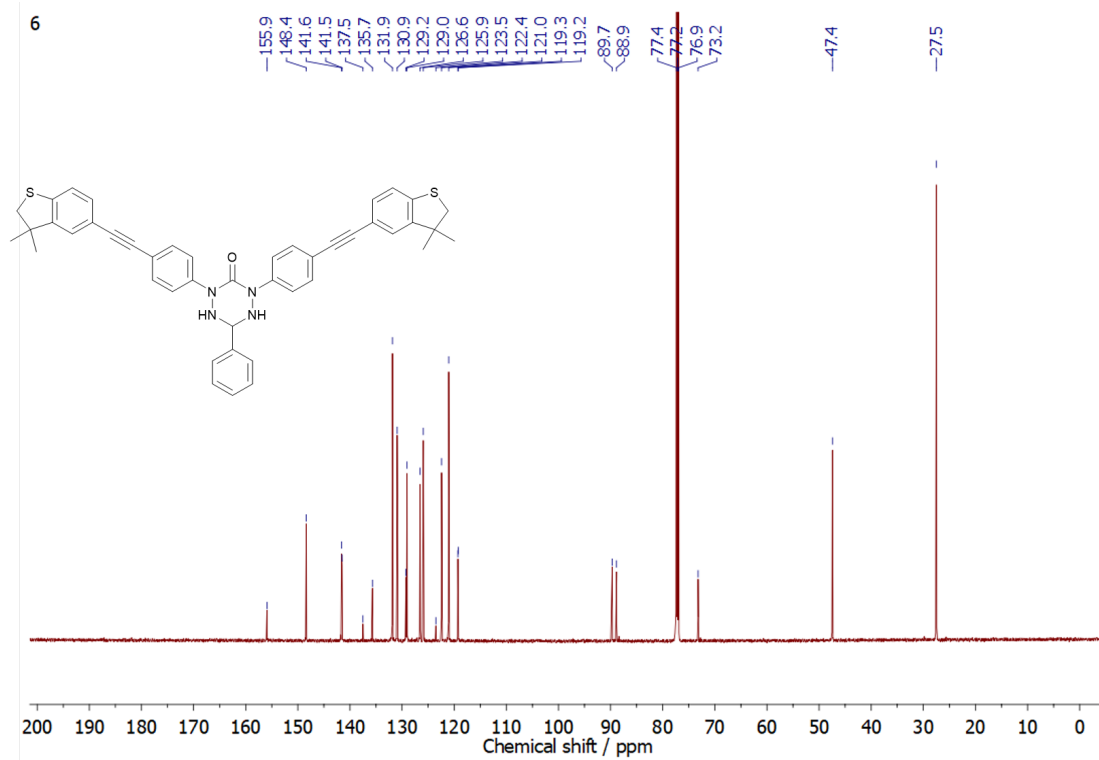

**Figure S30.** The  $^{13}\text{C}\{^1\text{H}\}$  NMR spectrum of **6**.

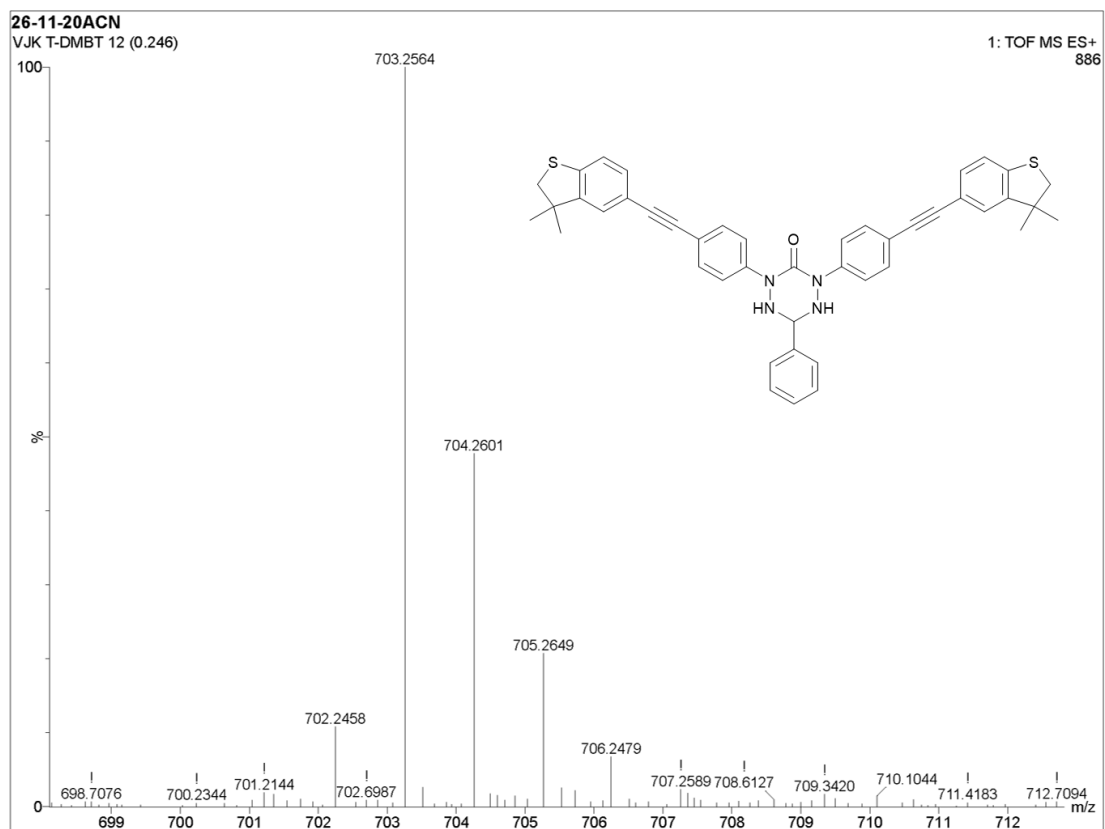

**Figure S31.** The mass spectrum of **6**.

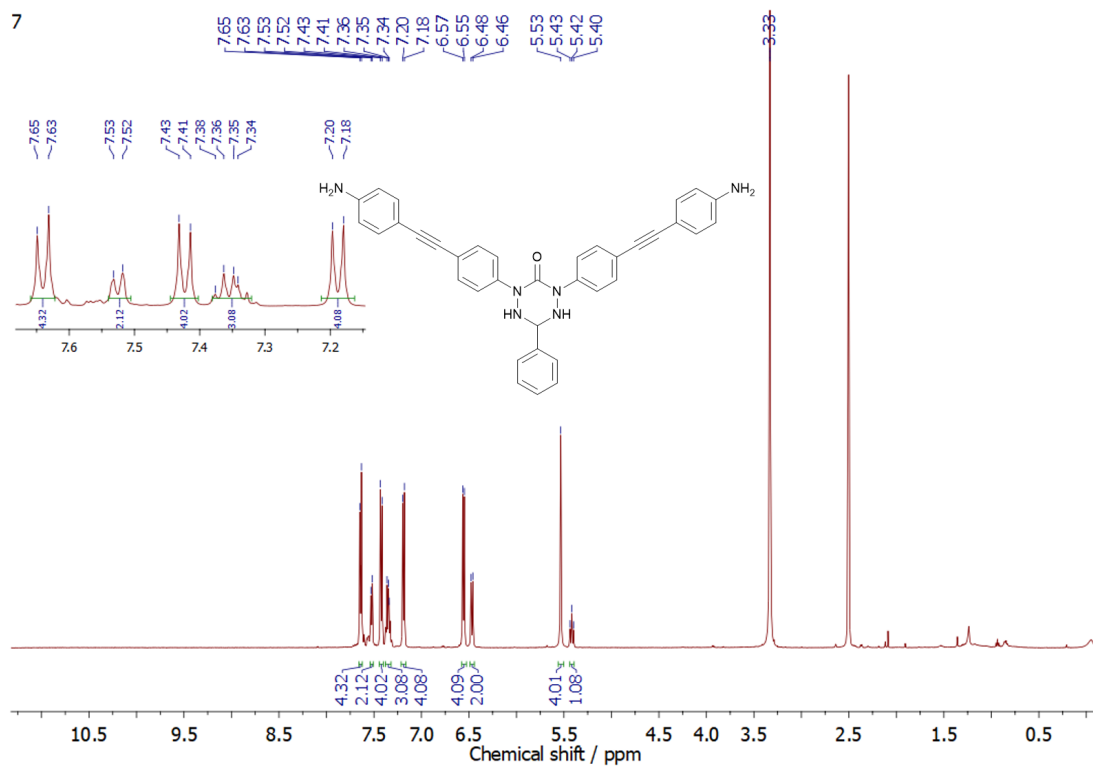

**Figure S32.** The <sup>1</sup>H NMR spectrum of 7. The inset shows an expansion of the aromatic region for clarity.

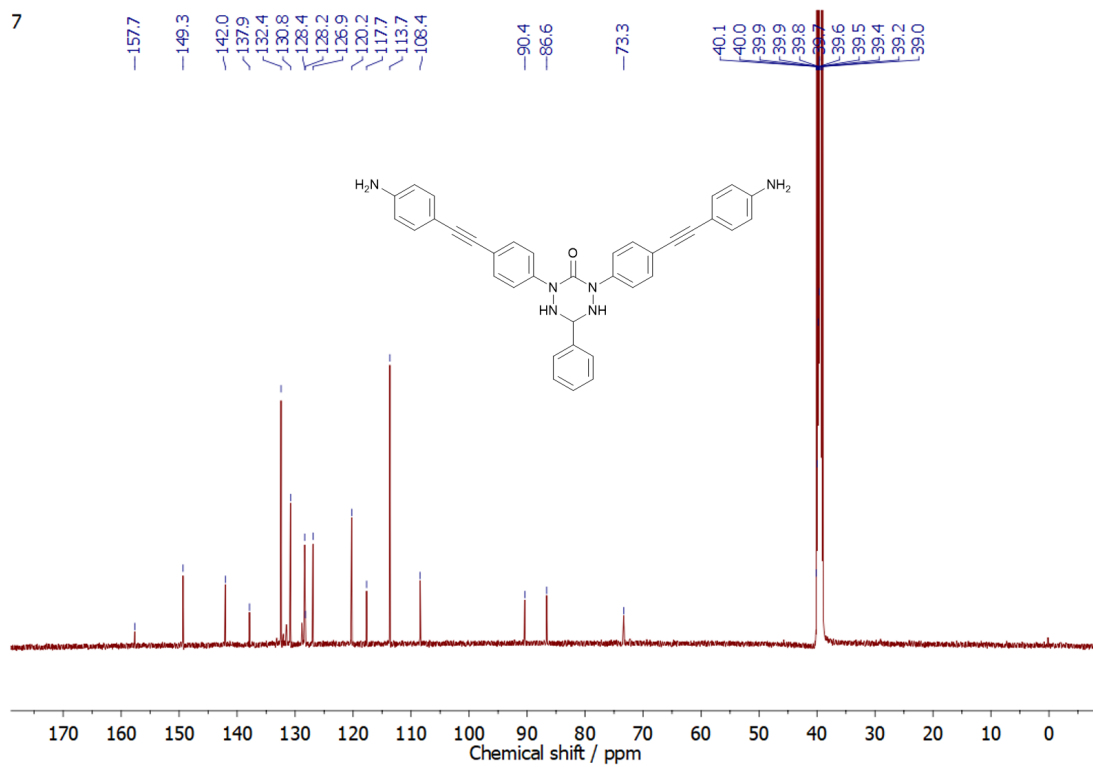

Figure S33. The  $^{13}\text{C}\{^1\text{H}\}$  NMR spectrum of 7.

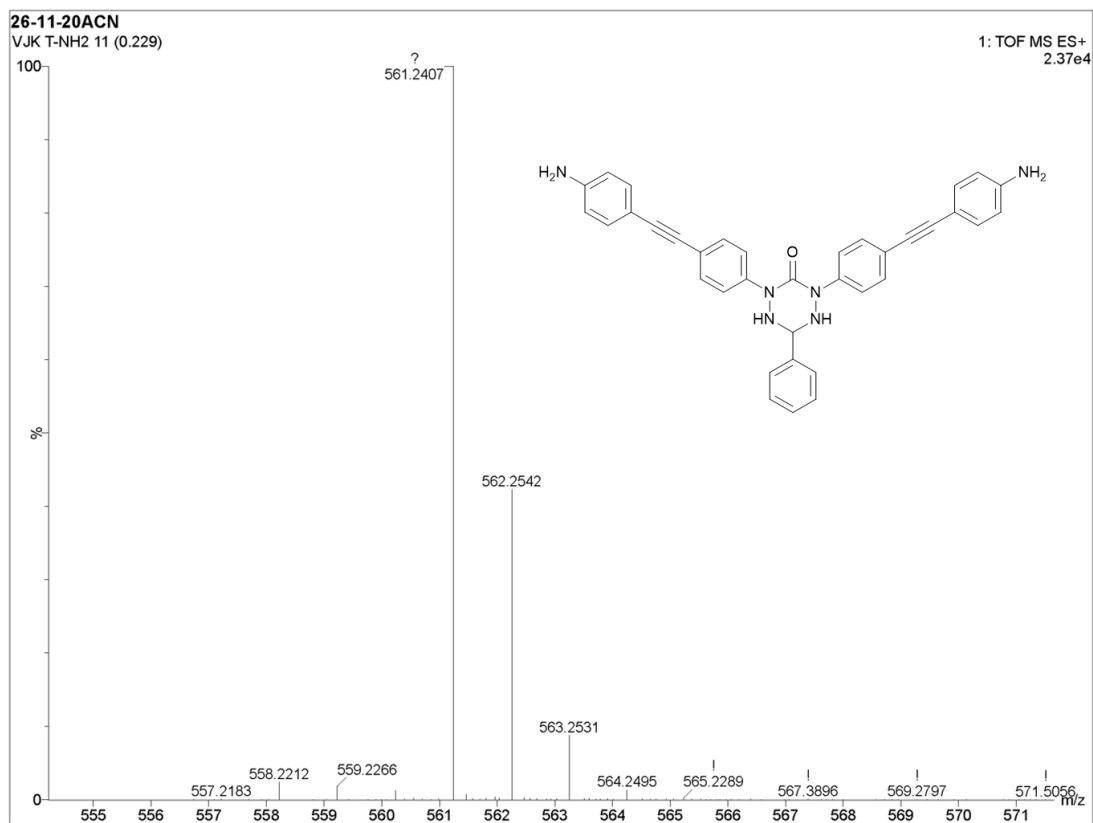

Figure S34. The mass spectrum of 7.



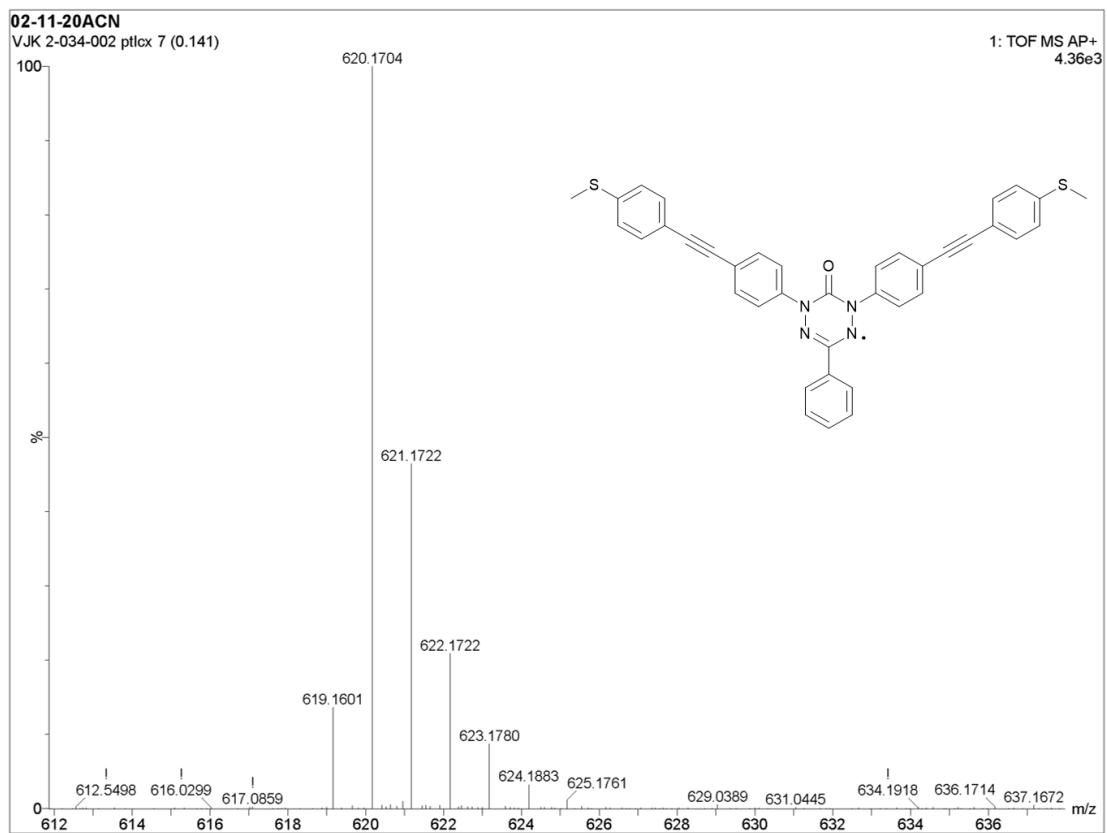

Figure S35. The mass spectrum of **8**.

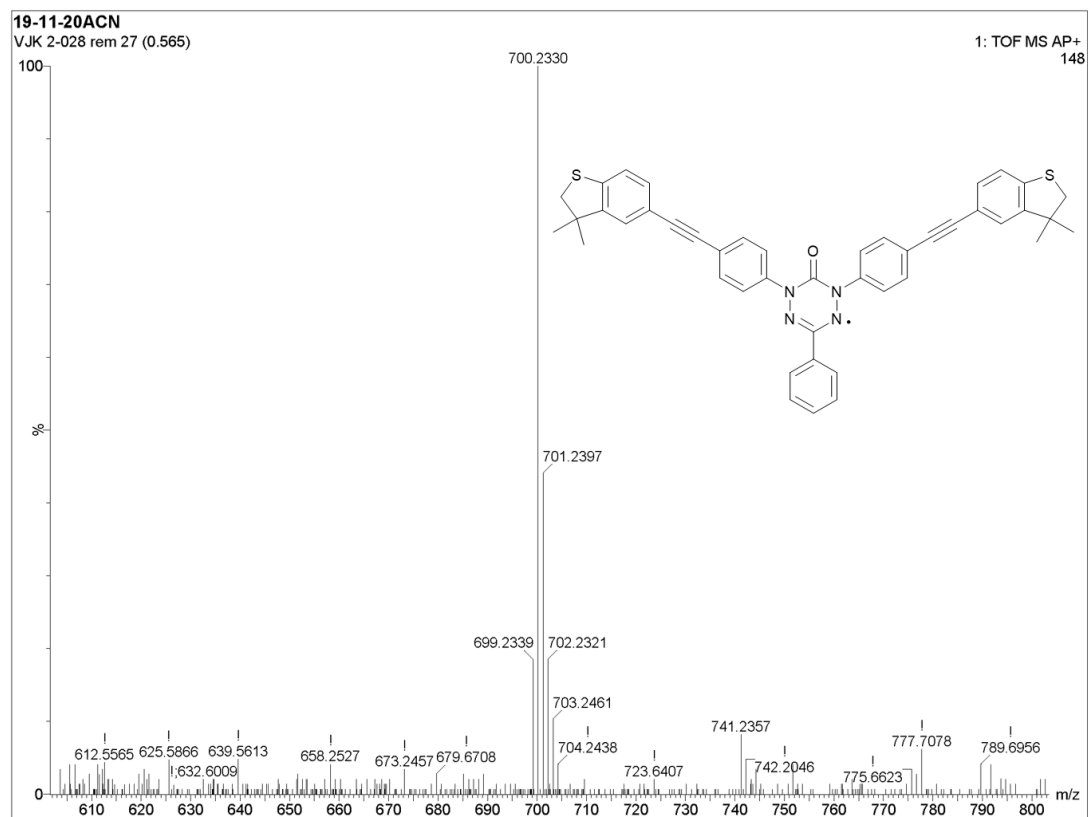

Figure S36. The mass spectrum of 9.

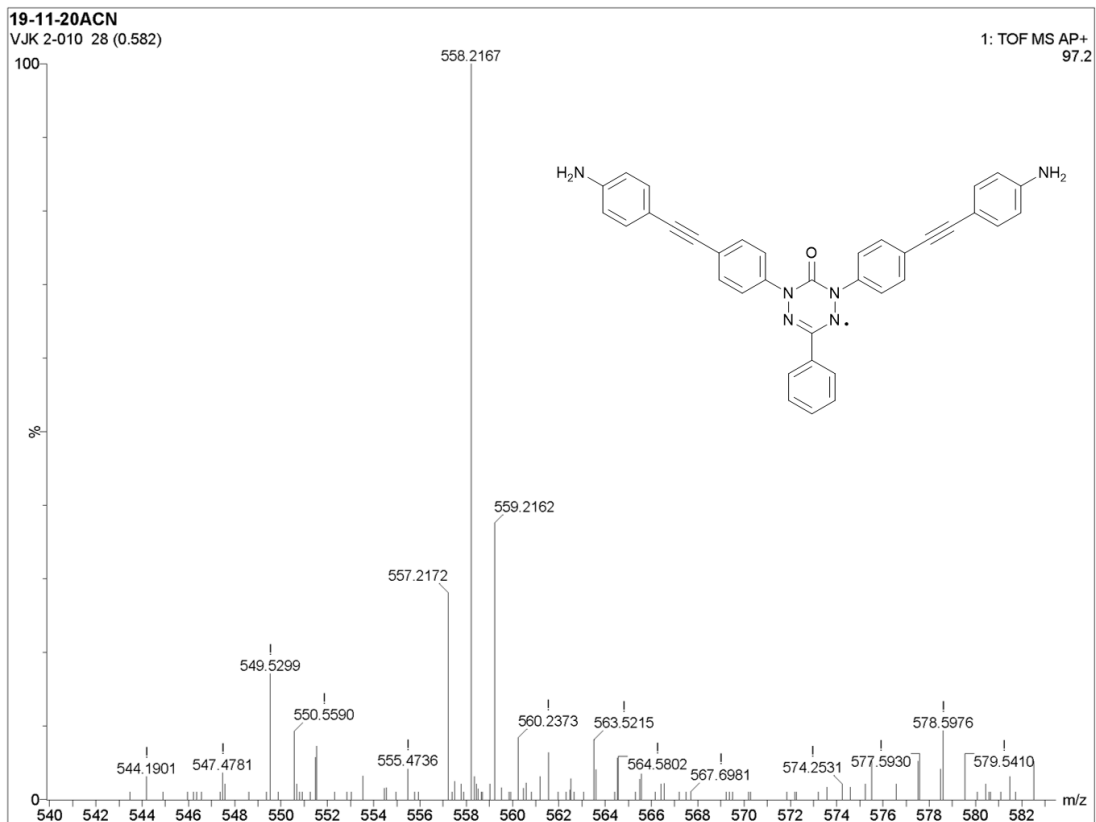

Figure S37. The mass spectrum of 10.

## Additional EPR materials and Methods

A basis set that describes the radical spin manifold can be built from the product of the eigenstates of the interacting electron ( $S = 1/2$ ) and nuclear ( $^{14}\text{N}$ ,  $I = 1$ ) spins:

$$|S \ M\rangle \otimes |I_1 \ m_1\rangle \otimes |I_2 \ m_2\rangle \otimes |I_3 \ m_3\rangle \otimes |I_4 \ m_4\rangle \quad \text{Eq. 1}$$

Here,  $S$  refers to the electronic spin state,  $M$  refers to the electronic magnetic sublevel,  $I_i$  refers to the nuclear spin state of  $^{14}\text{N}$ , and  $m_i$  refers to the nuclear magnetic sublevels of each  $^{14}\text{N}$ .  $S$  take the value of  $1/2$  and  $M$  the values  $\pm 1/2$ .  $I_i$  the value of 1 and  $m_i$  the values -1, 0 and +1. The spin Hamiltonian that describes the spin manifold is:

$$\hat{H} = g\beta_e \vec{B}_0 \cdot \vec{S} + \sum_{i=1}^4 (-g_n \beta_n \vec{B}_0 \cdot \vec{I}_i + a_i \vec{S} \cdot \vec{I}_i) \quad \text{Eq. 2}$$

It contains (i) an electronic Zeeman term describing the unpaired electron's interaction with the applied magnetic field ( $g$ ), (ii) a nuclear Zeeman term for each  $^{14}\text{N}$  nucleus and the applied magnetic field, and (iii) an electron-nuclear hyperfine term ( $a_i$ ) for each  $^{14}\text{N}$  nucleus describing the magnetic interaction between the unpaired electron and each nucleus. Note that the nuclear quadrupole term does not need to be considered when simulation the EPR spectrum.

Owing to the symmetry of the oxoverdazyl framework, the four  $^{14}\text{N}$  hyperfine couplings represent two equivalent sets: two larger couplings  $a_1$  and  $a_2$ ; and two smaller couplings  $a_3$  and  $a_4$ . In the text, Figure 9 and Table 2,  $a_1$  and  $a_2$  are described by the label  $a(\text{N}_{2,3})$  and  $a_3$  and  $a_4$  are described by the label  $a(\text{N}_{1,4})$  which makes use of the crystallographic labelling of the four nitrogen sites (Scheme 3).
